# Supplementary material for: Increase in the use of inhaled nitric oxide in neonatal intensive care units in England: a retrospective population study
Source: PubMed Central journal article supplement — BMJ Paediatr Open. 2021 Feb 22;5(1):e000897. doi: 10.1136/bmjpo-2020-000897 (PMC7903123; doi:10.1136/bmjpo-2020-000897), 2021-02-22
Supplement: bmjpo-2020-000897.draft_revisions.pdf [file bmjpo-2020-000897.draft_revisions.pdf]

# BMJ Paediatrics Open

BMJ Paediatrics Open is committed to open peer review. As part of this commitment we make the peer review history of every article we publish publicly available.

When an article is published we post the peer reviewers' comments and the authors' responses online. We also post the versions of the paper that were used during peer review. These are the versions that the peer review comments apply to.

The versions of the paper that follow are the versions that were submitted during the peer review process. They are not the versions of record or the final published versions. They should not be cited or distributed as the published version of this manuscript.

BMJ Paediatrics Open is an open access journal and the full, final, typeset and author-corrected version of record of the manuscript is available on our site with no access controls, subscription charges or pay-per-view fees (<http://bmjpaedsopen.bmj.com>).

If you have any questions on BMJ Paediatrics Open's open peer review process please email [info.bmjpo@bmj.com](mailto:info.bmjpo@bmj.com)

# BMJ Paediatrics Open

## Increasing use of inhaled nitric oxide in neonatal intensive care units in England: a retrospective population study

|                               |                                                                                                                                                                                                                                                                                                                                                                                                |
|-------------------------------|------------------------------------------------------------------------------------------------------------------------------------------------------------------------------------------------------------------------------------------------------------------------------------------------------------------------------------------------------------------------------------------------|
| Journal:                      | <i>BMJ Paediatrics Open</i>                                                                                                                                                                                                                                                                                                                                                                    |
| Manuscript ID                 | bmjpo-2020-000897                                                                                                                                                                                                                                                                                                                                                                              |
| Article Type:                 | Original research                                                                                                                                                                                                                                                                                                                                                                              |
| Date Submitted by the Author: | 02-Oct-2020                                                                                                                                                                                                                                                                                                                                                                                    |
| Complete List of Authors:     | Subhedar, Nimish; Liverpool Women's Hospital, Neonatal Intensive care Unit<br>Jawad, Sena; Imperial College London, Neonatal Data Analysis Unit<br>Oughham, Kayleigh; Imperial College London, Neonatal Data Analysis Unit<br>Gale, Chris; Imperial College London Faculty of Medicine, Neonatal Medicine<br>Battersby, Cheryl; Imperial College London Faculty of Medicine, Neonatal Medicine |
| Keywords:                     | Neonatology, Epidemiology                                                                                                                                                                                                                                                                                                                                                                      |
|                               |                                                                                                                                                                                                                                                                                                                                                                                                |

SCHOLARONE™  
Manuscripts

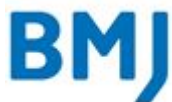

I, the Submitting Author has the right to grant and does grant on behalf of all authors of the Work (as defined in the below author licence), an exclusive licence and/or a non-exclusive licence for contributions from authors who are: i) UK Crown employees; ii) where BMJ has agreed a CC-BY licence shall apply, and/or iii) in accordance with the terms applicable for US Federal Government officers or employees acting as part of their official duties; on a worldwide, perpetual, irrevocable, royalty-free basis to BMJ Publishing Group Ltd ("BMJ") its licensees and where the relevant Journal is co-owned by BMJ to the co-owners of the Journal, to publish the Work in this journal and any other BMJ products and to exploit all rights, as set out in our [licence](#).

The Submitting Author accepts and understands that any supply made under these terms is made by BMJ to the Submitting Author unless you are acting as an employee on behalf of your employer or a postgraduate student of an affiliated institution which is paying any applicable article publishing charge ("APC") for Open Access articles. Where the Submitting Author wishes to make the Work available on an Open Access basis (and intends to pay the relevant APC), the terms of reuse of such Open Access shall be governed by a Creative Commons licence – details of these licences and which [Creative Commons](#) licence will apply to this Work are set out in our licence referred to above.

Other than as permitted in any relevant BMJ Author's Self Archiving Policies, I confirm this Work has not been accepted for publication elsewhere, is not being considered for publication elsewhere and does not duplicate material already published. I confirm all authors consent to publication of this Work and authorise the granting of this licence.

1  
2  
3  
4  
5 **Title:**  
6  
7

8 **Increasing use of inhaled nitric oxide in neonatal intensive care units in England:**  
9 **a retrospective population study**  
10  
11  
12  
13  
14  
15  
16

17 **Authors**  
18  
19

20 Dr. Nimish Subhedar, Neonatologist <sup>1</sup>  
21  
22

23 Ms. Sena Jawad, Neonatal Clinical Trials Statistician <sup>2</sup>  
24  
25

26 Miss. Kayleigh Ougham, Senior Data Analyst <sup>2</sup>  
27  
28

29 Dr. Chris Gale, Reader in Neonatal Medicine and Neonatologist <sup>3</sup>  
30  
31  
32

33 Dr. Cheryl Battersby, Clinical Senior Lecturer, Neonatologist <sup>3</sup>  
34  
35  
36  
37  
38  
39  
40  
41  
42  
43

44 **Affiliations:**  
45  
46  
47

48 <sup>1</sup> Neonatal Intensive Care Unit, Liverpool Women's Hospital, Liverpool L8 7SS.  
49  
50

51 <sup>2</sup> Neonatal Data Analysis Unit, Imperial College London, Chelsea and Westminster  
52 Hospital campus, London, SW10 9NH.  
53  
54  
55  
56  
57  
58  
59  
60

1  
2  
3  
4  
5  
6  
7  
8  
9  
10  
11  
12  
13  
14  
15  
16  
17  
18  
19  
20  
21  
22  
23  
24  
25  
26  
27  
28  
29  
30  
31  
32  
33  
34  
35  
36  
37  
38  
39  
40  
41  
42  
43  
44  
45  
46  
47  
48  
49  
50  
51  
52  
53  
54  
55  
56  
57  
58  
59  
60

<sup>3</sup> Neonatal Medicine, School of Public Health, Faculty of Medicine, Imperial College London, Chelsea and Westminster Hospital campus, London, SW10 9NH.

Confidential: For Review Only

## **Abstract**

### Objective

To describe temporal changes in inhaled Nitric Oxide (iNO) use in English neonatal units between 2010 to 2015

### Design

Retrospective analysis using data extracted from the National Neonatal Research Database (NNRD)

### Setting

All National Health Service neonatal units in England

### Patients

Infants of all gestational ages born 2010- 2015 admitted to a neonatal unit and received intensive care

### Main outcome measures

Proportion of infants who received iNO; age at initiation and duration of iNO use

### Results

4.9% (6,346/129,883) of infants received iNO; 31% (1,959/6,346) were born <29 weeks, 18% (1,152/6,346) 29-33 weeks and 51% (3,235/6,346)  $\geq$ 34 weeks gestation. Between epoch 1 (2010-2011) and epoch 3 (2014-2015), there was i) an increase in the proportion of infants receiving iNO: < 29 weeks (4.9 vs 15.9%); 29-33 weeks (1.1 vs 4.8%);  $\geq$  34 weeks (4.5 vs 5.0%) ii) increase in postnatal age at iNO initiation: <29 weeks 10 vs 18 days; 29-33 weeks 2 vs 10 days iii) reduction in iNO duration: <29 weeks (3 vs 2 days); 29-33 weeks (2 vs 1 day). There were no statistically significant differences in patient characteristics.

## Conclusions

Between 2010 and 2015 there was an increase in the use of iNO among infants admitted to English neonatal units. This was most notable among the most premature infants with an almost four-fold increase. Given the paucity of evidence for iNO use in preterm infants, further research is needed to better understand the long-term impact and identify infants most likely to benefit.

## **Introduction**

Inhaled nitric oxide (iNO) is widely used in the treatment of hypoxaemic respiratory failure and persistent pulmonary hypertension of the newborn. Although a well-established therapy in term and near-term infants with these conditions, the off-label use of iNO in preterm infants <34 weeks gestation remains controversial. Population-based data indicate that there is wide variation in administration rates amongst US hospitals, but there are no equivalent data from the UK or mainland Europe (1-4). Data from individual centres and multicentre studies suggest that the use of iNO is increasing (2-5), especially in preterm infants, despite the lack of evidence of benefit in this population.

We aimed to describe temporal changes in the use of iNO in neonates admitted to neonatal units in England using national data routinely recorded during clinical care and held in the National Neonatal Research database (NNRD). Our objectives were to i) describe the proportion and characteristics of preterm and term infants who receive iNO between 2010 and 2015; ii) determine whether there is variation in iNO use across tertiary level neonatal units, and over time between 2010 and 2015.



## **Methods**

### **Setting, study design, data source and ethics approval**

This retrospective cohort study used routinely recorded, de-identified data held in the NNRD. The NNRD has complete coverage of infants admitted for neonatal care at a National Health Service (NHS) neonatal unit in England, Scotland and Wales. The NNRD is formed from data extracted from neonatal electronic health record systems used by health professionals during routine clinical care. A defined data extract comprising approximately 450 items (6), the Neonatal Data Set, is transmitted quarterly to the Neonatal Data Analysis Unit at Imperial College London where data are cleaned and entered into the NNRD. High completeness and accuracy (>95%) of data held in the NNRD has been confirmed by a formal comparison with those recorded in Case Record Forms of a multicentre, randomised placebo-controlled trial (7). Neonatal units in England contributing data to the NNRD consented for their unit data to be included in the study. The study was approved by West of Scotland Research Ethics Committee 5; reference number 16/WS/0228.

### **Study population and data extraction**

We included data from infants who required any neonatal intensive care (defined using British Association of Perinatal Medicine categories of care 2011 (8), primarily as needing mechanical ventilation or non-invasive ventilation plus parenteral nutrition) over a 6-year period, 01/01/2010 to 31/12/2015 in England. Infants who did not receive intensive care on a neonatal unit or who were not cared for completely in units in Wales and Scotland, were excluded from the analysis.

We extracted daily variables (receipt of iNO, surfactant), demographic variables (birthweight, sex, gestational age), maternal factors (prolonged rupture of membranes >24 hours), diagnoses and survival to neonatal unit discharge. See supplementary file 1 for diagnostic codes.

### **Outcomes**

1  
2  
3 The primary outcome was rate of iNO use as a proportion of infants that received  
4 neonatal intensive care, and unit level.  
5  
6  
7

8 The following secondary outcomes were analysed for infants that received iNO:

- 9  
10 - Timing of iNO initiation (postnatal age in days)  
11  
12 - Duration of iNO  
13  
14 - Diagnoses including respiratory distress syndrome (RDS), persistent pulmonary  
15 hypertension of the newborn (PPHN), pulmonary hypoplasia, congenital pneumonia,  
16 congenital diaphragmatic hernia, congenital heart disease, meconium aspiration  
17 syndrome (among infants  $\geq 34$  weeks gestation)  
18  
19 - Survival to neonatal unit discharge  
20  
21  
22  
23

### 24 **Statistical analyses**

25 We conducted analyses for the primary outcome at two levels: 1) at the level of the  
26 population of infants that received at least 1 day of neonatal intensive care; and 2) at  
27 the level of the neonatal unit. For all outcomes separate analyses were conducted by *a-*  
28 *priori* defined gestational age bands: (a) extremely preterm ( $< 29$  weeks gestation); (b)  
29 moderately preterm (29-33 weeks gestation); and (c) late preterm/term ( $\geq 34$  weeks  
30 gestation).  
31  
32  
33  
34  
35  
36  
37

38 Results are presented using medians (interquartile ranges) and percentages for  
39 continuous and categorical variables, respectively. We tested whether iNO use and  
40 duration changed significantly between the first epoch (2010-2011) and the third epoch  
41 (2014-2015) using either chi-squared tests or Wilcoxon rank sum test.  
42  
43  
44  
45

46 For the neonatal unit-level analysis, we limited this to the 47 tertiary neonatal units in  
47 England who have treated 5 or more infants with nitric oxide. For this analysis we  
48 attributed iNO use to the first unit providing iNO therapy regardless of whether an infant  
49 was treated with iNO in more than one neonatal unit. The total number of neonatal units  
50 in England during this period decreased from 169 (in 2010-11) to 161 (in 2014-15); this  
51  
52  
53  
54  
55  
56  
57  
58  
59  
60

reflects the merger or closure of units. Rates of iNO use across tertiary units are presented graphically without comparative testing.

## Patient and Public Involvement

Results will be disseminated to parents, ex-patients and members of the public through the Imperial College Neonatal Data Analysis Unit website, social media, and strong links between the authors and parent/patient groups.

## Results

During the 6-year study period 129,883 infants received at least 1 day of intensive care in England; 4.9% (6,346) of these received iNO. Use of iNO increased significantly over time from 3.4% (1,293/37,885) in 2010-2011 to 6.4% (3,112/48,838) in 2014-2015.

There were no significant differences in gestational age, birth weight or sex between birth year epochs (Table 1).

When analysed by gestational age band over the entire study period, 9.9% (1,959/19,727) of infants born <29 weeks received iNO; corresponding percentages are 2.8% (1,152/41,133) for 29-33 weeks and 4.7% (3,235/69,022) for  $\geq 34$  weeks (Tables 1-3). Mortality among iNO treated infants decreased over time in all gestational age groups.

### By gestational age bands

#### <29 weeks

31% (1,959/6,346) of infants that received iNO were born < 29 weeks gestation (Table 1). Among infants born in the later epoch, a lower proportion had diagnoses of prolonged rupture of membranes or pulmonary hypoplasia recorded and a higher proportion had RDS recorded and received surfactant. (Table 1). 282 had congenital heart disease; the most common were atrial or ventricular septal defects (67%) (Supplementary Table 2).

#### 29-33 weeks

1  
2  
3 18% (1,152/6,346) of infants that received iNO were born at 29-33 weeks gestation. A  
4 lower proportion of infants born in the later epoch had PPHN recorded and a higher  
5 proportion had RDS recorded, although surfactant use was lower in the later epoch. In  
6 the 2014-2015 epoch iNO was initiated later and administered for a shorter duration  
7 (Table 2). 264 infants had congenital heart disease; 52% were atrial or ventricular septal  
8 defects (Supplementary Table 2).  
9

### 14 **≥34 weeks**

15  
16 51% (3,235/6,346) of infants that received iNO had a gestational age of ≥ 34 weeks at  
17 birth. The proportion of these infants who received iNO increased marginally but  
18 significantly between 2010-2011 and 2014-2015. A lower proportion of these infants  
19 born in the later epoch had prolonged rupture of membranes, PPHN or meconium  
20 aspiration syndrome, and a higher proportion had RDS recorded and received  
21 surfactant. iNO was initiated later and administered for a shorter duration (Table 3). 616  
22 of these infants that received iNO had congenital heart disease and 41.6% (256/616)  
23 were atrial or ventricular septal defects (Supplementary Table 2).  
24  
25  
26  
27  
28  
29  
30

### 31 **Comparison between tertiary units**

32  
33 There was wide variation in the proportion of infants receiving intensive care who also  
34 received iNO between the 47 tertiary neonatal intensive care units in England across all  
35 gestation groups (figure 1A). This was especially marked among infants < 29 weeks  
36 gestation where iNO use varied between 0.7% and 36.5% (Figure 1B).  
37  
38

39 When considering unit level trends over time, iNO use in >29 week gestation infants  
40 increased between 2010-2011 and 2014-2015 in almost all units (figure 1C), however a  
41 more mixed picture was seen in less preterm infants (figure 1D).  
42  
43  
44  
45  
46  
47  
48  
49  
50  
51  
52  
53  
54  
55  
56  
57  
58  
59  
60

**Table 1**

Patient demographics and outcomes for infants born less than 29 weeks gestation admitted to neonatal units in England

|                                                                                | <b>2010-11</b> | <b>2012-13</b> | <b>2014-15</b> | <b>p</b> |
|--------------------------------------------------------------------------------|----------------|----------------|----------------|----------|
| <b>Neonatal admissions requiring <math>\geq 1</math> day of intensive care</b> | 6730           | 6587           | 6410           |          |
| <b>Infants treated with iNO</b>                                                | 329 (4.9%)     | 611 (9.3%)     | 1019 (15.9%)   | p<0.01   |
| <b>Birth weight (g)</b>                                                        | 790 (650,950)  | 795 (670,985)  | 790 (660,985)  | 0.31     |
| <b>Gestational age (weeks)</b>                                                 | 26 (24, 27)    | 26 (24, 27)    | 26 (24, 27)    | 0.25     |
| <b>Male sex</b>                                                                | 180(55%)       | 364 (60%)      | 553 (54%)      | 0.89     |
| <b>Prolonged rupture of membranes &gt;24 hr<math>\infty</math></b>             | 113 (34.4%)    | 190 (31.1%)    | 173 (17.0%)    | P<0.001  |
| <b>Surfactant therapy in labour ward or neonatal unit</b>                      | 324 (98.5%)    | 589 (96.4%)    | 935(91.8%)     | P<0.001  |
| <b>Initiation of iNO therapy (day)</b>                                         | 10 (2,33)      | 13 (2,46)      | 18 (3,48)      | P<0.001  |
| <b>Duration of iNO therapy (days)</b>                                          | 3 (2,5)        | 2 (1,4)        | 2 (1,4)        | P<0.001  |
| <b>Diagnosis (not mutually exclusive)^</b>                                     |                |                |                |          |
| <i>Respiratory distress* syndrome (RDS)</i>                                    | 255 (77.5%)    | 505 (82.7%)    | 920 (90.3%)    | P<0.001  |
| <i>Pulmonary hypoplasia</i>                                                    | 30 (9.1%)      | 40 (6.6%)      | 49 (4.8%)      | P<0.01   |
| <i>Pulmonary hypertension</i>                                                  | 100 (30.4%)    | 164 (26.8%)    | 260 (25.5%)    | 0.08     |
| <i>Congenital pneumonia</i>                                                    | 2 (0.6%)       | 2 (0.3%)       | 10 (1.0%)      | 0.53     |

|                                        |             |             |             |         |
|----------------------------------------|-------------|-------------|-------------|---------|
| <i>Congenital diaphragmatic hernia</i> | 0           | 0           | 1 (0.1%)    | 0.57    |
| <b>Death</b>                           | 143 (43.5%) | 224 (36.7%) | 242 (23.8%) | P<0.001 |

The denominator for all proportions is the number of babies treated with iNO

All values given as n, % or median (25<sup>th</sup>,75<sup>th</sup> centiles), as appropriate.

\*This includes the diagnosis *Respiratory distress syndrome and signs of respiratory distress of newborn* (see supplementary file 1)

^Extracted codes available in supplementary file

∞ Prolonged rupture of membranes >24 hrs uses a combination of discharge diagnoses and recorded duration of rupture of membranes

**Table 2**

Patient demographics and outcomes for infants born 29-33 weeks' admitted to neonatal units in England

|                                                                                | <b>2010-11</b>      | <b>2012-13</b>      | <b>2014-15</b>                   | <b>p</b> |
|--------------------------------------------------------------------------------|---------------------|---------------------|----------------------------------|----------|
| <b>Neonatal admissions requiring <math>\geq</math> 1 day of intensive care</b> | 12781               | 13796               | 14556                            |          |
| <b>Infants treated with iNO</b>                                                | 144 (1.1%)          | 315 (2.3%)          | 693 (4.8%)                       | p<0.001  |
| <b>Birth weight (g)</b>                                                        | 1603<br>(1311,1972) | 1500<br>(1290,1800) | 1500 <sup>†</sup><br>(1256,1800) | 0.01     |
| <b>Gestational age (weeks)</b>                                                 | 30 (29,32)          | 31 (29,32)          | 31 (30,32)                       | 0.76     |
| <b>Male sex</b>                                                                | 91 (63.2%)          | 187 (59.4%)         | 406 (58.6%)                      | 0.31     |
| <b>Prolonged rupture of membranes &gt;24 hr<sup>∞</sup></b>                    | 34 (23.6%)          | 86 (27.3%)          | 124 (17.9%)                      | 0.11     |
| <b>Surfactant therapy in labour ward or neonatal unit</b>                      | 131 (91.0%)         | 229 (72.7%)         | 418 (60.3%)                      | p<0.001  |
| <b>Initiation of iNO therapy (days)</b>                                        | 2 (1,3)             | 3 (1,20)            | 10 (2,24)                        | p<0.001  |
| <b>Duration of iNO therapy (days)</b>                                          | 2 (2,4)             | 1 (1,3)             | 1 (1,2)                          | p<0.001  |
| <b>Diagnosis (not mutually exclusive)<sup>^</sup></b>                          |                     |                     |                                  |          |
| <i>Respiratory distress* syndrome</i>                                          | 92 (63.9%)          | 240 (76.2%)         | 604(87.2%)                       | p<0.001  |
| <i>Pulmonary hypoplasia</i>                                                    | 23 (16.0%)          | 46 (14.6%)          | 72 (10.4%)                       | 0.05     |
| <i>Pulmonary hypertension</i>                                                  | 76 (52.8%)          | 108 (34.3%)         | 163 (23.5%)                      | p<0.001  |

|                                        |            |            |            |         |
|----------------------------------------|------------|------------|------------|---------|
| <i>Congenital pneumonia</i>            | 1 (0.7%)   | 3 (1.0%)   | 2 (0.3%)   | 0.46    |
| <i>Congenital diaphragmatic hernia</i> | 7 (4.9%)   | 11 (3.5%)  | 15 (2.2%)  | 0.07    |
| <b>Death</b>                           | 59 (41.0%) | 68 (21.6%) | 76 (11.0%) | p<0.001 |

The denominator for all proportions is the number of babies treated with iNO

All values given as n, % or median (25<sup>th</sup>,75<sup>th</sup> centiles) as appropriate.

\*This includes the diagnosis *Respiratory distress syndrome* and *signs of respiratory distress of newborn* (see supplementary file 1)

^Extracted codes available in supplementary file

∞ Prolonged rupture of membranes >24 hrs uses a combination of discharge diagnoses and recorded duration of rupture of membranes

† 1 baby with a birthweight less than 300 grams was removed from this calculation (n=692)



**Table 3**

Patient demographics and outcomes for infants born  $\geq 34$  weeks' gestation admitted to neonatal units in England

|                                                                                | <b>2010-11</b>      | <b>2012-13</b>      | <b>2014-15</b>                   | <b>p</b> |
|--------------------------------------------------------------------------------|---------------------|---------------------|----------------------------------|----------|
| <b>Neonatal admissions requiring <math>\geq 1</math> day of intensive care</b> | 18374               | 22777               | 27872                            |          |
| <b>Infants treated with iNO</b>                                                | 820 (4.5%)          | 1015 (4.5%)         | 1400 (5.0%)                      | p<0.01   |
| <b>Birth weight (g)</b>                                                        | 3273<br>(2840,3665) | 3240<br>(2760,3690) | 3220 <sup>†</sup><br>(2680,3630) | 0.02     |
| <b>Gestational age (weeks)</b>                                                 | 40 (38,41)          | 39 (37,40)          | 39 (37,40)                       | p<0.001  |
| <b>Male sex</b>                                                                | 450 (54.9%)         | 577 (56.9%)         | 756 (54.0%)                      | 0.69     |
| <b>Prolonged rupture of membranes &gt;24 hr<sup>∞</sup></b>                    | 82 (10.0%)          | 92 (9.1%)           | 68(4.9%)                         | p<0.001  |
| <b>Surfactant therapy in labour ward or neonatal unit</b>                      | 532 (64.9%)         | 613 (60.4%)         | 713(50.9%)                       | p<0.001  |
| <b>Initiation of iNO therapy (days)</b>                                        | 2 (1,2)             | 2 (1,2)             | 2 (1,2)                          | 0.02     |
| <b>Duration of iNO therapy (days)</b>                                          | 3 (2,5)             | 3 (2,5)             | 2 (1,5)                          | p<0.001  |
| <b>Diagnosis (not mutually exclusive)<sup>^</sup></b>                          |                     |                     |                                  |          |
| <i>Respiratory distress syndrome*</i>                                          | 259 (31.6%)         | 378 (37.2%)         | 778 (55.6%)                      | p<0.001  |
| <i>Pulmonary hypoplasia</i>                                                    | 61 (7.4%)           | 67 (6.6%)           | 101 (7.2%)                       | 0.84     |
| <i>Meconium aspiration syndrome</i>                                            | 314 (38.3%)         | 378 (37.2%)         | 440 (31.4%)                      | p<0.01   |
| <i>Pulmonary hypertension</i>                                                  | 598 (72.9%)         | 703 (69.3%)         | 885 (63.2%)                      | p<0.001  |
| <i>Congenital pneumonia</i>                                                    | 42 (5.1%)           | 52 (5.1%)           | 74 (5.3%)                        | 0.87     |

|                                        |             |             |             |        |
|----------------------------------------|-------------|-------------|-------------|--------|
| <i>Congenital diaphragmatic hernia</i> | 55(6.7%)    | 57(5.6%)    | 83 (5.9%)   | 0.46   |
| <b>Death</b>                           | 165 (20.1%) | 160 (15.8%) | 212 (15.1%) | p<0.01 |

The denominator for all proportions is the number of babies treated with iNO

All values given as n, % or median (25<sup>th</sup>,75<sup>th</sup> centiles) as appropriate.

\*This includes the diagnosis *Respiratory distress syndrome* and *signs of respiratory distress of newborn* (see supplementary file 1)

^Extracted codes available in supplementary file

∞ Prolonged rupture of membranes >24 hrs uses a combination of discharge diagnoses and recorded duration of rupture of membranes

† 1 baby with a birthweight less than 300 grams was removed from this calculation (n=1399)

## **Discussion**

In this large population-level study we found that almost 1 in 20 infants that received any period of intensive care at an English neonatal unit were treated with iNO, that this rate almost doubled between 2010-2011 and 2014-2015 and that the temporal increase in iNO use was seen across all gestational ages. The temporal increase was most evident among more preterm infants < 34 weeks, in whom the use of iNO increased three-fold from 2.4% to 8.2% and where evidence for iNO is most lacking. In the most preterm group an additional 690 infants born <29 gestational weeks were treated with iNO in 2014-15 compared with 2010-11.

It is difficult to compare these data with internationally reported iNO usage rates because other studies commonly report rates as a proportion of all neonatal admissions, whereas we report rates as a proportion of infants receiving neonatal intensive care. We used this denominator because of differences in the organisation of neonatal care, specifically the use of a networked model of care in the United Kingdom which results in numerous transfers between neonatal units as part of routine care, and to minimise the impact of variations in practice around admissions of term infants for short periods. Rates of iNO usage in US studies are reported between 0.9% and 1.3% (2, 3) of all neonatal admissions. To our knowledge, this is one of the largest studies of iNO use in neonatal practice and the only to report data at national level; other studies have reported iNO use in a various US healthcare organisations (including children's hospitals) and in all admissions including infants receiving lower acuity categories of neonatal care (1, 4, 9, 10).

Approximately half of all infants that received iNO in this study were born at < 34 weeks gestation. This is relevant because the licensed indication for iNO limits treatment to newborn infants  $\geq$  34 weeks gestation with hypoxic respiratory failure associated with clinical or echocardiographic evidence of pulmonary hypertension (11). This finding is, however, broadly consistent with other studies from the US and Europe which showed that 40-46% of all treated infants were <34 weeks gestation (3, 12). Treatment rates for preterm infants in this study (5.1% of preterm infants < 34 weeks gestation) were

1  
2  
3 comparable to other studies from the US reporting rates of 2.6% to 7.2% in the same  
4 gestation groups (1, 4, 9, 10), and in this comparison the different denominator in US  
5 studies is less likely to influence results as the majority of more preterm infants will  
6 receive intensive care.  
7  
8  
9

10  
11 We find that not only is off-label treatment with iNO of preterm infants < 34 weeks  
12 gestation widespread, it is increasing – particularly in the most preterm infants. The  
13 evidence base supporting routine use in these most preterm infants, both in respect of  
14 safety and efficacy, is weakest (2-4). The reason for increasing use of iNO off-label in  
15 preterm infants is not known but is likely to be multifaceted and reflect the absence of  
16 other proven ‘rescue’ cardiorespiratory interventions for infants with severe hypoxaemic  
17 respiratory failure (such as ECMO) in this population, growing experience in the use of  
18 iNO, the absence of evidence of short-term harm, and that off-label use of iNO is fully  
19 reimbursed in England. Furthermore there is some limited evidence for the use of iNO in  
20 specific groups of preterm infants including those born following preterm prolonged  
21 rupture of membranes and those with echocardiographic criteria of PPHN physiology,  
22 supported by expert opinion and consensus statements (13-15). Treatment with iNO  
23 was started later and duration of treatment was shorter in later epochs, suggesting that  
24 preterm infants were more commonly treated outside the acute respiratory phase.  
25 Although there is little evidence of efficacy of iNO as rescue therapy in acute respiratory  
26 failure or later ventilator-dependent chronic lung disease (16, 17), we speculate that  
27 clinicians might be increasingly willing to use off-label iNO in such circumstances.  
28  
29  
30  
31  
32  
33  
34  
35  
36  
37  
38  
39  
40  
41  
42

43 This study also demonstrates large variation between English neonatal units in rates of  
44 iNO use, in keeping with that reported in recent US studies (1, 10) where a similar  
45 degree of variation from 0.4% to 21.9% was seen in iNO use in preterm infants between  
46 13 NICHD neonatal research network centres. The variation between neonatal units in  
47 the US decreased following publication of national guidance (18). Such national  
48 guidance is not available for the UK but might help to standardise practice in this area if  
49 it were to be developed.  
50  
51  
52  
53  
54  
55  
56  
57  
58  
59  
60

1  
2  
3 Overall mortality decreased in iNO-treated infants during the study period. This trend  
4 mirrors national data reporting improved survival in extremely preterm infants in  
5 England (19) over a similar timeframe. The lower mortality seen in later epochs may  
6 also reflect a change in case-mix as iNO therapy is offered more readily to infants with  
7 less severe cardiorespiratory failure. This type of 'therapeutic creep' has been described  
8 with other neonatal interventions (20). This study was not designed to analyse changes  
9 in outcomes beyond simple descriptive data.  
10  
11  
12  
13  
14  
15  
16

17 The strengths of this study include the use of a large national dataset derived from  
18 electronic patient data routinely entered by health professionals at the point of care,  
19 which has been shown to be accurate and complete. This contrasts with previous  
20 similar reports such as those from the National Institute of Child Health and  
21 Development Neonatal Research Network and the Pediatrix Medical Group that have  
22 focused on admissions to tertiary neonatal units or to a large network of neonatal care  
23 providers respectively (3, 9). Limitations of this study include that data held in the  
24 NNRD are recorded as part of routine clinical care and we cannot exclude the possibility  
25 of incomplete or inaccurate data. Also, we did not set out to capture information about  
26 neonatal iNO use in other critical care settings, such as paediatric or cardiac intensive  
27 care units and these data would have been excluded from this study. Our study was  
28 also not designed to describe specific aspects of iNO therapy such as indication for use  
29 and dosage regimens.  
30  
31  
32  
33  
34  
35  
36  
37  
38  
39  
40

41 Our study describes the increasing use of iNO, especially in more preterm infants, but  
42 was not designed to address the issue of potential benefits and risks of this practice.  
43 While iNO might be effective in certain subgroups of preterm infants, such as those with  
44 pulmonary hypoplasia and/or PPHN physiology, its short- and long-term safety has not  
45 yet been established. Potential concerns include an association between neonatal iNO  
46 therapy and pulmonary toxicity, brain injury and an increased risk of childhood cancer  
47 (21, 22). Inhaled nitric oxide is also one of the most expensive treatments available in  
48 neonatal care and there are likely to be resource implications of increasing use.  
49  
50  
51  
52  
53  
54  
55  
56  
57  
58  
59  
60

1  
2  
3 Although there are limited data on costs of iNO therapy in the UK (23), estimates from  
4 the USA suggest a cost of approximately \$125/hour or \$3000/day (24).  
5  
6  
7

8 In summary, the use of iNO in English neonatal units has almost doubled between 2010  
9 and 2015, with the most notable increase seen in the most premature infants. There  
10 was substantial variation in iNO use between units. Approximately half of treated infants  
11 were preterm < 34 weeks gestation in whom iNO was used off-label and without high  
12 quality evidence of efficacy or safety. Development of consensus guidelines may help  
13 standardise practice. In light of the substantial cost of iNO therapy and uncertainty over  
14 the later life effects of this treatment, further research is needed to better understand the  
15 long-term impacts and to identify populations of infants most likely to benefit from iNO  
16 therapy.  
17  
18  
19  
20  
21  
22  
23  
24  
25  
26  
27  
28  
29  
30  
31  
32  
33  
34  
35  
36  
37  
38  
39  
40  
41  
42  
43  
44  
45  
46  
47  
48  
49  
50  
51  
52  
53  
54  
55  
56  
57  
58  
59  
60

### What is already known on this topic

maximum of 3 brief statements (no more than 25 words per statement)

- Inhaled nitric oxide (iNO) is a well-established and licensed therapy in term and near-term infants with hypoxaemic respiratory failure and pulmonary hypertension
- Evidence for the safety and efficacy of iNO in preterm infants is lacking
- iNO use is highly variable internationally; data describing iNO use across neonatal units in the United Kingdom is lacking

### What this study adds

maximum of 3 brief statements (no more than 25 words per statement).

- 4.9% of infants admitted for neonatal intensive care in England received treatment with iNO between 2010 and 2015
- The increase in use of iNO is most notable in the most preterm infants born <29 weeks for which there is a paucity of evidence of benefit
- There is wide variation in iNO usage between neonatal intensive care units in England

### Acknowledgements

We wish to acknowledge all neonatal in the UK Neonatal collaborative who contribute data to the NNRD\*

### Funding:

No specific funding was received for this study

### Author contributions

Study concept and design: NS, CG

Development of source code: KO, SJ, CB

Analysis and interpretation of data: NS, SJ, CG, CB

Writing and revision of the manuscript: NS, SJ, KO, CG, CB

### Competing interests

CG reports grants from Medical Research Council, the National Institute for Health Research, the Mason Medical Research Foundation, Rosetrees Foundation and Canadian Institute for Health Research outside the submitted work; and grants and personal fees to attend an educational conference from Chiesi Pharmaceuticals outside the submitted work; he is a voluntary, unremunerated member of the Neonatal Data Analysis Unit Steering Board, which oversees the National Neonatal Research Database (NNRD), and is vice-chair of the NIHR Research for Patient Benefit London Regional Assessment Panel.

CB reports grants from the National Institute for Health Research outside the submitted work; and grants and personal fees to attend educational conferences from Chiesi and Abbvie Pharmaceuticals outside the submitted work; and is a member of the NIHR HTA prioritisation committee.

### Data and materials availability:

The NNRD is not immediately available to the public. However, requests can be made by researchers to acquire access through: [https://www.imperial.ac.uk/neonatal-data-analysis-unit/neonatal-data/utilising-the-nnrd/](https://www.imperial.ac.uk/neonatal-data-analysis-unit/neonatal-data/utilising-the-nnr/)



## References

1. Stenger MR, Slaughter JL, Kelleher K, Shepherd EG, Klebanoff MA, Reagan P, et al. Hospital variation in nitric oxide use for premature infants. *Pediatrics*. 2012;129(4):e945-51.
2. Clark RH, Ursprung RL, Walker MW, Ellsbury DL, Spitzer AR. The changing pattern of inhaled nitric oxide use in the neonatal intensive care unit. *J Perinatol*. 2010;30(12):800-4.
3. Ellsworth MA, Harris MN, Carey WA, Spitzer AR, Clark RH. Off-label use of inhaled nitric oxide after release of NIH consensus statement. *Pediatrics*. 2015;135(4):643-8.
4. Handley SC, Steinhorn RH, Hopper AO, Govindaswami B, Bhatt DR, Van Meurs KP, et al. Inhaled nitric oxide use in preterm infants in California neonatal intensive care units. *Journal of perinatology : official journal of the California Perinatal Association*. 2016;36(8):635-9.
5. Gaddam Bhoomaiah S, Rasiah SV. Outcomes of inhaled nitric oxide in preterm neonates - a five-year experience in a tertiary neonatal centre. *Acta Paediatr*. 2015;104(9):880-2.
6. Neonatal Data Analysis Unit. Neonatal Data Set 2014 [Available from: [https://www1.imperial.ac.uk/resources/7567FFEA-2D3D-493C-A959-46BB76794CEE/neonataldatasetisb1595release1version22\\_circulationversion1\\_appendix\\_one.pdf](https://www1.imperial.ac.uk/resources/7567FFEA-2D3D-493C-A959-46BB76794CEE/neonataldatasetisb1595release1version22_circulationversion1_appendix_one.pdf)].
7. Battersby C, Statnikov Y, Santhakumaran S, Gray D, Modi N, Costeloe K, et al. The United Kingdom National Neonatal Research Database: A validation study. *PLoS One*. 2018;13(8):e0201815.
8. BAPM. Categories of care 2011 [Available from: <http://www.bapm.org/publications/documents/guidelines/CatsofcarereportAug11.pdf>].
9. Truog WE, Nelin LD, Das A, Kendrick DE, Bell EF, Carlo WA, et al. Inhaled nitric oxide usage in preterm infants in the NICHD Neonatal Research Network: inter-site variation and propensity evaluation. *J Perinatol*. 2014;34(11):842-6.
10. Carey WA, Weaver AL, Mara KC, Clark RH. Inhaled Nitric Oxide in Extremely Premature Neonates With Respiratory Distress Syndrome. *Pediatrics*. 2018;141(3):e20173108.
11. Agency EM. iNOMax Summary of Product Characteristics [Available from: [https://www.ema.europa.eu/en/documents/product-information/inomax-epar-product-information\\_en.pdf](https://www.ema.europa.eu/en/documents/product-information/inomax-epar-product-information_en.pdf)].
12. Dewhurst C, Ibrahim H, Göthberg S, Jónsson B, Subhedar N, registry ObotEino. Use of inhaled nitric oxide in the new born period: results from the European inhaled nitric oxide registry. *Acta Paediatrica*. 2010;99(6):854-60.
13. de Waal K, Kluckow M. Prolonged rupture of membranes and pulmonary hypoplasia in very preterm infants: pathophysiology and guided treatment. *J Pediatr*. 2015;166(5):1113-20.
14. Baczynski M, Ginty S, Weisz DE, McNamara PJ, Kelly E, Shah P, et al. Short-term and long-term outcomes of preterm neonates with acute severe pulmonary hypertension following rescue treatment with inhaled nitric oxide. *Arch Dis Child Fetal Neonatal Ed*. 2017;102(6):F508-f14.

15. Kinsella JP, Steinhorn RH, Krishnan US, Feinstein JA, Adata I, Austin ED, et al. Recommendations for the Use of Inhaled Nitric Oxide Therapy in Premature Newborns with Severe Pulmonary Hypertension. *J Pediatr.* 2016;170:312-4.
16. Barrington KJ, Finer N, Pennaforte T. Inhaled nitric oxide for respiratory failure in preterm infants. *Cochrane Database Syst Rev.* 2017;1:Cd000509.
17. Hasan SU, Potenziano J, Konduri GG, Perez JA, Van Meurs KP, Walker MW, et al. Effect of Inhaled Nitric Oxide on Survival Without Bronchopulmonary Dysplasia in Preterm Infants: A Randomized Clinical Trial. *JAMA Pediatr.* 2017;171(11):1081-9.
18. Cole FS, Alleyne C, Barks JD, Boyle RJ, Carroll JL, Dokken D, et al. NIH Consensus Development Conference statement: inhaled nitric-oxide therapy for premature infants. *Pediatrics.* 2011;127(2):363-9.
19. Santhakumaran S, Statnikov Y, Gray D, Battersby C, Ashby D, Modi N. Survival of very preterm infants admitted to neonatal care in England 2008–2014: time trends and regional variation. *Archives of Disease in Childhood - Fetal and Neonatal Edition.* 2017.
20. Kariholu U, Montaldo P, Markati T, Lally PJ, Pryce R, Teiserskas J, et al. Therapeutic hypothermia for mild neonatal encephalopathy: a systematic review and meta-analysis. *Arch Dis Child Fetal Neonatal Ed.* 2020;105(2):225-8.
21. Van Meurs KP, Cohen TL, Yang G, Somaschini M, Kuruma P, Dennery PA. Inhaled NO and markers of oxidant injury in infants with respiratory failure. *J Perinatol.* 2005;25(7):463-9.
22. Van Meurs K, Hintz S, Rhine W, Benitz W. The use of inhaled nitric oxide in the premature infant with respiratory distress syndrome. *Minerva Pediatr.* 2006;58(5):403-22.
23. Subhedar NV, Jauhari P, Natarajan R. Cost of inhaled nitric oxide therapy in neonates. *Lancet.* 2002;359(9319):1781-2.
24. Watson RS, Clermont G, Kinsella JP, Kong L, Arendt RE, Cutter G, et al. Clinical and economic effects of iNO in premature newborns with respiratory failure at 1 year. *Pediatrics.* 2009;124(5):1333-43.

1  
2  
3  
4  
5  
6  
7  
8  
9  
10  
11  
12  
13  
14  
15  
16  
17  
18  
19  
20  
21  
22  
23  
24  
25  
26  
27  
28  
29  
30  
31  
32  
33  
34  
35  
36  
37  
38  
39  
40  
41  
42  
43  
44  
45  
46  
47  
48  
49  
50  
51  
52  
53  
54  
55  
56  
57  
58  
59  
60

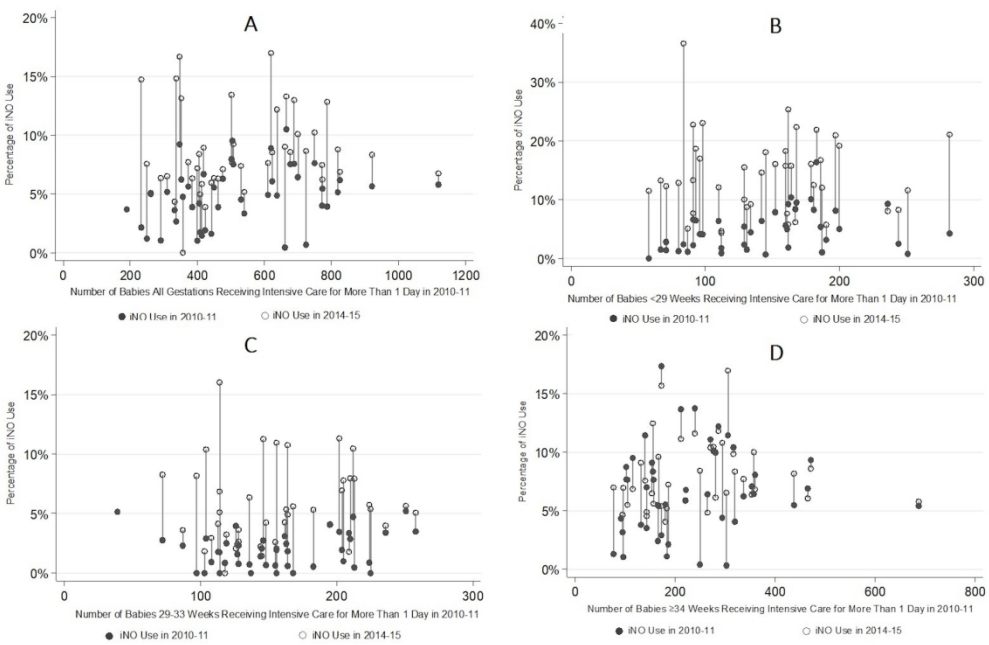

265x172mm (300 x 300 DPI)

## **Supplementary file 1**

### **Diagnostic codes<sup>†</sup> extracted from the National Neonatal Research Database (NNRD):**

Respiratory distress syndrome if any of the following:

- '15574'- signs of respiratory distress of newborn
- '15572'- Respiratory distress syndrome
- '11010179'- respiratory distress-signs of
- '15571' Respiratory Distress (ARDS)

Pulmonary hypoplasia if any of the following:

- '16143'- Hypoplastic lungs
- '16154'- Hypoplasia and dysplasia of lung
- '10892'- Pulmonary hypoplasia
- '16151'- Agenesis of lung

Persistent pulmonary hypertension of the newborn if any of the following:

- '15241'- Primary pulmonary hypertension (not PPHN)
- '15242'- Secondary pulmonary hypertension (not PPHN)
- '10010891'- Pulmonary hypertension (secondary)
- '10891'-Pulmonary hypertension (secondary)
- '10890'- Pulmonary hypertension (primary)
- '10010890'- Pulmonary hypertension (primary)
- '15621'- Pulmonary hypertension (PPHN)
- '10829'- Persistent Pulmonary Hypertension of the Newborn (PPHN)
- '15630'- Persistent Pulmonary Hypertension (PPHN secondary to other condition)
- '15629'- Persistent Pulmonary Hypertension (PPHN: idiopathic)

Meconium Aspiration Syndrome:

- '15588'- Meconium aspiration syndrome

Congenital pneumonia if any of the following:

- '15577'- Congenital pneumonia due to viral agent
- '15581'- Congenital pneumonia due to Streptococcus, group B
- '15580'- Congenital pneumonia due to Staphylococcus
- '15583'- Congenital pneumonia due to Pseudomonas
- '15585'- Congenital pneumonia due to other organisms
- '15584'- Congenital pneumonia due to other bacterial agents
- '15582'- Congenital pneumonia due to Escherichia coli
- '15578'- Congenital pneumonia due to Chlamydia
- '15586'- Congenital pneumonia (unknown or unspecified cause)
- '15587'- Congenital pneumonia

1  
2  
3  
4  
5  
6  
7  
8  
9  
10  
11  
12  
13  
14  
15  
16  
17  
18  
19  
20  
21  
22  
23  
24  
25  
26  
27  
28  
29  
30  
31  
32  
33  
34  
35  
36  
37  
38  
39  
40  
41  
42  
43  
44  
45  
46  
47  
48  
49  
50  
51  
52  
53  
54  
55  
56  
57  
58  
59  
60

Congenital diaphragmatic hernia if any of the following:

- '16495'- Congenital diaphragic hernia
- '16497'- Eventration of diaphragic hernia
- '1001925'- Unspecified repair of diaphragmatic hernia
- '1006671'- Repair of congenital diaphragmatic hernia
- '10905'- Recurrent congenital diaphragmatic hernia
- '11660'- Prosthetic repair of congenital diaphragmatic hernia (specify)
- '11657'- Primary repair of congenital diaphragmatic hernia
- '1001924'- Other specified repair of diaphragmatic hernia
- '11597'- Other repair of diaphragmatic hernia (specify)
- '10694'- Morgagni diaphragmatic hernia
- '1015977'- Diaphragmatic hernia - right
- '1015978'- Diaphragmatic hernia - left
- '1010217'- Diaphragmatic hernia - left
- '10010246'- Diaphragmatic hernia - congenital

Prolonged rupture of membranes >24 hr if any of the following:

- '15406'- Prolonged preterm rupture membranes >24hr
- '15459'- Prolonged rupture membranes (PROM: Term)
- '15407'- Prolonged rupture membranes >24hr
- '15462'- Preterm pre-labour rupture of membranes (PROM >24hrs)

† These diagnostic codes are specific to the Badger Net EPR system developed by Clevermed Ltd and from which the NNRD pulls neonatal data.

**Supplementary file 2**

Congenital heart disease diagnoses in order of frequency

| Diagnoses                                                    | Gestation (Weeks) |            |            | N (column percentage) |
|--------------------------------------------------------------|-------------------|------------|------------|-----------------------|
|                                                              | <29               | 29 to 33   | ≥34        |                       |
| Ventricular Septal Defect (VSD)                              | 79                | 85         | 160        | 324 (27.9%)           |
| Atrial Septal Defect (ASD)                                   | 111               | 52         | 96         | 259 (22.2%)           |
| Pulmonary stenosis                                           | 31                | 23         | 15         | 69 (5.9%)             |
| Transposition of the great arteries                          | 4                 | 11         | 52         | 67 (5.8%)             |
| Ventricular hypertrophy                                      | 11                | 13         | 26         | 50 (4.3%)             |
| Atrioventricular Septal Defect (AVSD)                        | 1                 | 8          | 25         | 34 (2.9%)             |
| Coarctation of aorta                                         | 4                 | 7          | 19         | 30 (2.6%)             |
| Congenital malformations of cardiac chambers and connections | 2                 | 4          | 23         | 29 (2.5%)             |
| Tetralogy of Fallot                                          | 5                 | 6          | 14         | 25 (2.2%)             |
| Other congenital heart diagnoses                             | 34                | 55         | 186        | 275 (23.7%)           |
| <b>Total</b>                                                 | <b>282</b>        | <b>264</b> | <b>616</b> | <b>1162</b>           |

# BMJ Paediatrics Open

## Increasing use of inhaled nitric oxide in neonatal intensive care units in England: a retrospective population study

|                               |                                                                                                                                                                                                                                                                                                                                                                                                |
|-------------------------------|------------------------------------------------------------------------------------------------------------------------------------------------------------------------------------------------------------------------------------------------------------------------------------------------------------------------------------------------------------------------------------------------|
| Journal:                      | <i>BMJ Paediatrics Open</i>                                                                                                                                                                                                                                                                                                                                                                    |
| Manuscript ID                 | bmjpo-2020-000897.R1                                                                                                                                                                                                                                                                                                                                                                           |
| Article Type:                 | Original research                                                                                                                                                                                                                                                                                                                                                                              |
| Date Submitted by the Author: | 27-Nov-2020                                                                                                                                                                                                                                                                                                                                                                                    |
| Complete List of Authors:     | Subhedar, Nimish; Liverpool Women's Hospital, Neonatal Intensive care Unit<br>Jawad, Sena; Imperial College London, Neonatal Data Analysis Unit<br>Oughham, Kayleigh; Imperial College London, Neonatal Data Analysis Unit<br>Gale, Chris; Imperial College London Faculty of Medicine, Neonatal Medicine<br>Battersby, Cheryl; Imperial College London Faculty of Medicine, Neonatal Medicine |
| Keywords:                     | Neonatology, Epidemiology                                                                                                                                                                                                                                                                                                                                                                      |
|                               |                                                                                                                                                                                                                                                                                                                                                                                                |

SCHOLARONE™  
Manuscripts

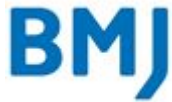

I, the Submitting Author has the right to grant and does grant on behalf of all authors of the Work (as defined in the below author licence), an exclusive licence and/or a non-exclusive licence for contributions from authors who are: i) UK Crown employees; ii) where BMJ has agreed a CC-BY licence shall apply, and/or iii) in accordance with the terms applicable for US Federal Government officers or employees acting as part of their official duties; on a worldwide, perpetual, irrevocable, royalty-free basis to BMJ Publishing Group Ltd ("BMJ") its licensees and where the relevant Journal is co-owned by BMJ to the co-owners of the Journal, to publish the Work in this journal and any other BMJ products and to exploit all rights, as set out in our [licence](#).

The Submitting Author accepts and understands that any supply made under these terms is made by BMJ to the Submitting Author unless you are acting as an employee on behalf of your employer or a postgraduate student of an affiliated institution which is paying any applicable article publishing charge ("APC") for Open Access articles. Where the Submitting Author wishes to make the Work available on an Open Access basis (and intends to pay the relevant APC), the terms of reuse of such Open Access shall be governed by a Creative Commons licence – details of these licences and which [Creative Commons](#) licence will apply to this Work are set out in our licence referred to above.

Other than as permitted in any relevant BMJ Author's Self Archiving Policies, I confirm this Work has not been accepted for publication elsewhere, is not being considered for publication elsewhere and does not duplicate material already published. I confirm all authors consent to publication of this Work and authorise the granting of this licence.



**Title:**

**Increasing use of inhaled nitric oxide in neonatal intensive care units in England:  
a retrospective population study**

**Authors**

Dr. Nimish Subhedar, Neonatologist <sup>1</sup>

Ms. Sena Jawad, Neonatal Clinical Trials Statistician <sup>2</sup>

Miss. Kayleigh Ougham, Senior Data Analyst <sup>2</sup>

Dr. Chris Gale, Reader in Neonatal Medicine and Neonatologist <sup>3</sup>

Dr. Cheryl Battersby, Clinical Senior Lecturer, Neonatologist <sup>3</sup>

**Corresponding author**

Dr Cheryl Battersby, Neonatal Medicine, School of Public Health, Faculty of Medicine,  
Imperial College London, Chelsea and Westminster Hospital campus, London, SW10  
9NH. [c.battersby@imperial.ac.uk](mailto:c.battersby@imperial.ac.uk)

+44 (0) 203 3153047

1  
2  
3 **Affiliations:**  
4  
5  
6

7  
8 <sup>1</sup> Neonatal Intensive Care Unit, Liverpool Women’s Hospital, Liverpool L8 7SS.  
9

10  
11  
12 <sup>2</sup> Neonatal Data Analysis Unit, Imperial College London, Chelsea and Westminster  
13 Hospital campus, London, SW10 9NH.  
14  
15

16  
17  
18 <sup>3</sup> Neonatal Medicine, School of Public Health, Faculty of Medicine, Imperial College  
19 London, Chelsea and Westminster Hospital campus, London, SW10 9NH.  
20  
21  
22  
23  
24  
25  
26  
27  
28  
29  
30  
31  
32  
33  
34  
35  
36  
37  
38  
39  
40  
41  
42  
43  
44  
45  
46  
47  
48  
49  
50  
51  
52  
53  
54  
55  
56  
57  
58  
59  
60

## Abstract

### Objective

To describe temporal changes in inhaled Nitric Oxide (iNO) use in English neonatal units between 2010 to 2015

### Design

Retrospective analysis using data extracted from the National Neonatal Research Database (NNRD)

### Setting

All National Health Service neonatal units in England

### Patients

Infants of all gestational ages born 2010- 2015 admitted to a neonatal unit and received intensive care

### Main outcome measures

Proportion of infants who received iNO; age at initiation and duration of iNO use

### Results

4.9% (6,346/129,883) of infants received iNO; 31% (1,959/6,346) were born <29 weeks, 18% (1,152/6,346) 29-33 weeks and 51% (3,235/6,346) >34 weeks gestation. Between epoch 1 (2010-2011) and epoch 3 (2014-2015), there was i) an increase in the proportion of infants receiving iNO: < 29 weeks (4.9 vs 15.9%); 29-33 weeks (1.1 vs 4.8%); > 34 weeks (4.5 vs 5.0%) ii) increase in postnatal age at iNO initiation: <29 weeks 10 vs 18 days; 29-33 weeks 2 vs 10 days iii) reduction in iNO duration: <29 weeks (3 vs 2 days); 29-33 weeks (2 vs 1 day). There were no statistically significant differences in patient characteristics.

### Conclusions

1  
2  
3 Between 2010 and 2015 there was an increase in the use of iNO among infants  
4 admitted to English neonatal units. This was most notable among the most premature  
5 infants with an almost four-fold increase. Given the cost of iNO therapy, limited  
6 evidence of efficacy in preterm infants, and potential for harm, we suggest that  
7 exposure to iNO should be limited, ideally to infants included in research studies (either  
8 observational or RCT) or within a protocolised pathway. Development of consensus  
9 guidelines may also help to standardise practice.  
10  
11  
12  
13  
14  
15  
16  
17  
18  
19  
20  
21  
22  
23  
24  
25  
26  
27  
28  
29  
30  
31  
32  
33  
34  
35  
36  
37  
38  
39  
40  
41  
42  
43  
44  
45  
46  
47  
48  
49  
50  
51  
52  
53  
54  
55  
56  
57  
58  
59  
60

## Introduction

Inhaled nitric oxide (iNO) is widely used in the treatment of hypoxaemic respiratory failure and persistent pulmonary hypertension of the newborn. Although a well-established therapy in term and near-term infants with these conditions, the off-label use of iNO in preterm infants <34 weeks gestation remains controversial. Population-based data indicate that there is wide variation in administration rates amongst US hospitals, but there are no equivalent data from the UK or mainland Europe (1-4). Data from individual centres and multicentre studies suggest that the use of iNO is increasing (2-5), especially in preterm infants, despite the lack of evidence of benefit in this population.

We aimed to describe temporal changes in the use of iNO in neonates admitted to neonatal units in England using national data routinely recorded during clinical care and held in the National Neonatal Research database (NNRD). Our objectives were to i) describe the proportion and characteristics of preterm and term infants who receive iNO between 2010 and 2015; ii) determine whether there is variation in iNO use across tertiary level neonatal units, and over time between 2010 and 2015.

## Methods

### Setting, study design, data source and ethics approval

This retrospective cohort study used routinely recorded, de-identified data held in the NNRD. The NNRD has complete coverage of infants admitted for neonatal care at a National Health Service (NHS) neonatal unit in England, Scotland and Wales. The NNRD is formed from data extracted from neonatal electronic health record systems used by health professionals during routine clinical care. A defined data extract comprising approximately 450 items (6), the Neonatal Data Set, is transmitted quarterly to the Neonatal Data Analysis Unit at Imperial College London where data are cleaned and entered into the NNRD. High completeness and accuracy (>95%) of data held in the NNRD has been confirmed by a formal comparison with those recorded in Case Record Forms of a multicentre, randomised placebo-controlled trial (RCT) (7). Neonatal units in England contributing data to the NNRD consented for their unit data to be included in the study. This study using anonymised data was approved by the West of Scotland Research Ethics Committee 5; reference number 16/WS/0228.

### Study population and data extraction

We included data from infants who required any neonatal intensive care (defined using British Association of Perinatal Medicine categories of care 2011 (8), primarily as needing mechanical ventilation or non-invasive ventilation plus parenteral nutrition) over a 6-year period, 01/01/2010 to 31/12/2015 in England. Infants who did not receive intensive care on a neonatal unit or who were not cared for completely in units in Wales and Scotland, were excluded from the analysis.

We extracted daily variables (receipt of iNO, surfactant), demographic variables (birthweight, sex, gestational age), maternal factors (prolonged rupture of membranes >24 hours), diagnoses and survival to neonatal unit discharge. See supplementary file 1 for diagnostic codes.

### Outcomes

1  
2  
3 The primary outcome was rate of iNO use as a proportion of infants that received  
4 neonatal intensive care, and unit level.  
5  
6  
7

8  
9 The following secondary outcomes were analysed for infants that received iNO:

- 10  
11 - Timing of iNO initiation (postnatal age in days)  
12  
13 - Duration of iNO  
14  
15 - Diagnoses including respiratory distress syndrome (RDS), persistent pulmonary  
16 hypertension of the newborn (PPHN), pulmonary hypoplasia, congenital pneumonia,  
17 congenital diaphragmatic hernia, congenital heart disease, meconium aspiration  
18 syndrome (among infants  $\geq 34$  weeks gestation)  
19  
20  
21 - Survival to neonatal unit discharge  
22  
23  
24  
25  
26  
27

## 28 **Statistical analyses**

29  
30 We describe the cohort at two levels: 1) at the level of the population of infants that  
31 received at least 1 day of neonatal intensive care; and 2) at the level of the neonatal  
32 unit. For all outcomes separate analyses were conducted by *a-priori* defined gestational  
33 age bands: (a) extremely preterm (< 29 weeks gestation); (b) moderately preterm (29-  
34 33 weeks gestation); and (c) late preterm/term (> 34 weeks gestation).  
35  
36  
37  
38

39 Results are presented using medians (interquartile ranges) and percentages for  
40 continuous and categorical variables, respectively. We tested whether iNO use and  
41 duration changed significantly between the first epoch (2010-2011) and the third epoch  
42 (2014-2015) using either chi-squared tests or Wilcoxon rank sum test.  
43  
44  
45

46 For the neonatal unit-level analysis, we limited this to the 47 tertiary neonatal units in  
47 England who have treated 5 or more infants with nitric oxide. For this analysis we  
48 attributed iNO use to the first unit providing iNO therapy regardless of whether an infant  
49 was treated with iNO in more than one neonatal unit. The total number of neonatal units  
50 in England during this period decreased from 169 (in 2010-11) to 161 (in 2014-15); this  
51  
52  
53  
54  
55  
56  
57  
58  
59  
60

reflects the merger or closure of units. Rates of iNO use across tertiary units are presented graphically without comparative testing.

## Patient and Public Involvement

Results will be disseminated to parents, ex-patients and members of the public through the Imperial College Neonatal Data Analysis Unit website, social media, and strong links between the authors and parent/patient groups.

## Results

During the 6-year study period 129,883 infants received at least 1 day of intensive care in England; 4.9% (6,346) of these received iNO. Use of iNO increased significantly over time from 3.4% (1,293/37,885) in 2010-2011 to 6.4% (3,112/48,838) in 2014-2015.

There were no significant differences in gestational age, birth weight or sex between birth year epochs (Table 1).

When analysed by gestational age band over the entire study period, 9.9% (1,959/19,727) of infants born <29 weeks received iNO; corresponding percentages are 2.8% (1,152/41,133) for 29-33 weeks and 4.7% (3,235/69,022) for ≥ 34 weeks (Tables 1-3). Mortality among iNO treated infants decreased over time in all gestational age groups.

### By gestational age bands

#### <29 weeks

31% (1,959/6,346) of infants that received iNO were born < 29 weeks gestation (Table 1). Among infants born in the later epoch, a lower proportion had diagnoses of prolonged rupture of membranes or pulmonary hypoplasia recorded and a higher proportion had RDS recorded and received surfactant. (Table 1). 282 had congenital heart disease; the most common were atrial or ventricular septal defects (67%) (Supplementary Table 2).



### 29-33 weeks

18% (1,152/6,346) of infants that received iNO were born at 29-33 weeks gestation. A lower proportion of infants born in the later epoch had PPHN recorded and a higher proportion had RDS recorded, although surfactant use was lower in the later epoch. In the 2014-2015 epoch iNO was initiated later and administered for a shorter duration (Table 2). 264 infants had congenital heart disease; 52% were atrial or ventricular septal defects (Supplementary Table 2).

### ≥34 weeks

51% (3,235/6,346) of infants that received iNO had a gestational age of ≥ 34 weeks at birth. The proportion of these infants who received iNO increased marginally but significantly between 2010-2011 and 2014-2015. A lower proportion of these infants born in the later epoch had prolonged rupture of membranes, PPHN or meconium aspiration syndrome, and a higher proportion had RDS recorded and received surfactant. iNO was initiated later and administered for a shorter duration (Table 3). 616 of these infants that received iNO had congenital heart disease and 41.6% (256/616) were atrial or ventricular septal defects (Supplementary Table 2).

### Comparison between tertiary units

There was wide variation in the proportion of infants receiving intensive care who also received iNO between the 47 tertiary neonatal intensive care units in England across all gestation groups (figure 1A). This was especially marked among infants < 29 weeks gestation where iNO use varied between 0.7% and 36.5% (Figure 1B).

When considering unit level trends over time, iNO use in >29 week gestation infants increased between 2010-2011 and 2014-2015 in almost all units (figure 1C), however a more mixed picture was seen in less preterm infants (figure 1D).

**Table 1**

Patient demographics and outcomes for infants born less than 29 weeks gestation admitted to neonatal units in England and treated with iNO

|                                                                                                       | <b>2010-11</b>   | <b>2012-13</b>   | <b>2014-15</b>   | <b>p</b> |
|-------------------------------------------------------------------------------------------------------|------------------|------------------|------------------|----------|
| <b>Neonatal admissions requiring <math>\geq</math> 1 day of intensive care (with and without iNO)</b> | 6730             | 6587             | 6410             |          |
| <b>Infants treated with iNO</b>                                                                       | 329<br>(4.9%†)   | 611<br>(9.3%†)   | 1019<br>(15.9%†) | p<0.01   |
| <b>Birth weight (g)</b>                                                                               | 790<br>(650,950) | 795<br>(670,985) | 790<br>(660,985) | 0.31     |
| <b>Gestational age (weeks)</b>                                                                        | 26 (24,<br>27)   | 26 (24, 27)      | 26 (24, 27)      | 0.25     |
| <b>Male sex</b>                                                                                       | 180(55%)         | 364 (60%)        | 553 (54%)        | 0.89     |
| <b>Prolonged rupture of membranes &gt;24 hr<sup>∞</sup></b>                                           | 113<br>(34.4%)   | 190<br>(31.1%)   | 173 (17.0%)      | P<0.001  |
| <b>Surfactant therapy in labour ward or neonatal unit</b>                                             | 324<br>(98.5%)   | 589<br>(96.4%)   | 935(91.8%)       | P<0.001  |
| <b>Initiation of iNO therapy (day)</b>                                                                | 10 (2,33)        | 13 (2,46)        | 18 (3,48)        | P<0.001  |
| <b>Duration of iNO therapy (days)</b>                                                                 | 3 (2,5)          | 2 (1,4)          | 2 (1,4)          | P<0.001  |
| <b>Diagnosis (not mutually exclusive)^</b>                                                            |                  |                  |                  |          |

|                                             |                |                |             |         |
|---------------------------------------------|----------------|----------------|-------------|---------|
| <i>Respiratory distress* syndrome (RDS)</i> | 255<br>(77.5%) | 505<br>(82.7%) | 920 (90.3%) | P<0.001 |
| <i>Pulmonary hypoplasia</i>                 | 30 (9.1%)      | 40 (6.6%)      | 49 (4.8%)   | P<0.01  |
| <i>Pulmonary hypertension</i>               | 100<br>(30.4%) | 164<br>(26.8%) | 260 (25.5%) | 0.08    |
| <i>Congenital pneumonia</i>                 | 2 (0.6%)       | 2 (0.3%)       | 10 (1.0%)   | 0.53    |
| <i>Congenital diaphragmatic hernia</i>      | 0              | 0              | 1 (0.1%)    | 0.57    |
| <b>Death among infants who received iNO</b> | 143<br>(43.5%) | 224<br>(36.7%) | 242 (23.8%) | P<0.001 |

The denominator for all proportions is the number of babies treated with iNO unless indicated otherwise

† Denominator is all admissions to neonatal unit admissions requiring  $\geq 1$  day of intensive care

All values given as n, % or median (25<sup>th</sup>, 75<sup>th</sup> centiles), as appropriate.

\*This includes the diagnosis *Respiratory distress syndrome* and *signs of respiratory distress of newborn* (see supplementary file 1)

^Extracted codes available in supplementary file

∞ Prolonged rupture of membranes >24 hrs uses a combination of discharge diagnoses and recorded duration of rupture of membranes

**Table 2**

Patient demographics and outcomes for infants born 29-33 weeks' admitted to neonatal units in England and treated with iNO

|                                                                                                       | <b>2010-11</b>           | <b>2012-13</b>           | <b>2014-15</b>                   | <b>p</b> |
|-------------------------------------------------------------------------------------------------------|--------------------------|--------------------------|----------------------------------|----------|
| <b>Neonatal admissions requiring <math>\geq</math> 1 day of intensive care (with and without iNO)</b> | 12781                    | 13796                    | 14556                            |          |
| <b>Infants treated with iNO</b>                                                                       | 144 (1.1% <sup>†</sup> ) | 315 (2.3% <sup>†</sup> ) | 693 (4.8% <sup>†</sup> )         | p<0.001  |
| <b>Birth weight (g)</b>                                                                               | 1603<br>(1311,1972)      | 1500<br>(1290,1800)      | 1500 <sup>†</sup><br>(1256,1800) | 0.01     |
| <b>Gestational age (weeks)</b>                                                                        | 30 (29,32)               | 31 (29,32)               | 31 (30,32)                       | 0.76     |
| <b>Male sex</b>                                                                                       | 91 (63.2%)               | 187 (59.4%)              | 406 (58.6%)                      | 0.31     |
| <b>Prolonged rupture of membranes &gt;24 hr<sup>∞</sup></b>                                           | 34 (23.6%)               | 86 (27.3%)               | 124 (17.9%)                      | 0.11     |
| <b>Surfactant therapy in labour ward or neonatal unit</b>                                             | 131 (91.0%)              | 229 (72.7%)              | 418 (60.3%)                      | p<0.001  |
| <b>Initiation of iNO therapy (days)</b>                                                               | 2 (1,3)                  | 3 (1,20)                 | 10 (2,24)                        | p<0.001  |
| <b>Duration of iNO therapy (days)</b>                                                                 | 2 (2,4)                  | 1 (1,3)                  | 1 (1,2)                          | p<0.001  |
| <b>Diagnosis (not mutually exclusive)<sup>^</sup></b>                                                 |                          |                          |                                  |          |

|                                             |            |             |             |         |
|---------------------------------------------|------------|-------------|-------------|---------|
| <i>Respiratory distress* syndrome</i>       | 92 (63.9%) | 240 (76.2%) | 604(87.2%)  | p<0.001 |
| <i>Pulmonary hypoplasia</i>                 | 23 (16.0%) | 46 (14.6%)  | 72 (10.4%)  | 0.05    |
| <i>Pulmonary hypertension</i>               | 76 (52.8%) | 108 (34.3%) | 163 (23.5%) | p<0.001 |
| <i>Congenital pneumonia</i>                 | 1 (0.7%)   | 3 (1.0%)    | 2 (0.3%)    | 0.46    |
| <i>Congenital diaphragmatic hernia</i>      | 7 (4.9%)   | 11 (3.5%)   | 15 (2.2%)   | 0.07    |
| <b>Death among infants who received iNO</b> | 59 (41.0%) | 68 (21.6%)  | 76 (11.0%)  | p<0.001 |

The denominator for all proportions is the number of babies treated with iNO unless indicated otherwise

† Denominator is all admissions to neonatal unit admissions requiring  $\geq 1$  day of intensive care

All values given as n, % or median (25<sup>th</sup>,75<sup>th</sup> centiles) as appropriate.

\*This includes the diagnosis *Respiratory distress syndrome* and *signs of respiratory distress of newborn* (see supplementary file 1)

^Extracted codes available in supplementary file

∞ Prolonged rupture of membranes >24 hrs uses a combination of discharge diagnoses and recorded duration of rupture of membranes

† 1 baby with a birthweight less than 300 grams was removed from this calculation (n=692)

**Table 3**

Patient demographics and outcomes for infants born >34 weeks' gestation admitted to neonatal units in England and treated with iNO

|                                                                                          | <b>2010-11</b>           | <b>2012-13</b>            | <b>2014-15</b>                   | <b>p</b> |
|------------------------------------------------------------------------------------------|--------------------------|---------------------------|----------------------------------|----------|
| <b>Neonatal admissions requiring <math>\geq 1</math> day of intensive care (with and</b> |                          |                           |                                  |          |
| <b>Infants treated with iNO</b>                                                          | 820 (4.5% <sup>†</sup> ) | 1015 (4.5% <sup>†</sup> ) | 1400 (5.0% <sup>†</sup> )        | p<0.01   |
| <b>Birth weight (g)</b>                                                                  | 3273<br>(2840,3665)      | 3240<br>(2760,3690)       | 3220 <sup>†</sup><br>(2680,3630) | 0.02     |
| <b>Gestational age (weeks)</b>                                                           | 40 (38,41)               | 39 (37,40)                | 39 (37,40)                       | p<0.001  |
| <b>Male sex</b>                                                                          | 450 (54.9%)              | 577 (56.9%)               | 756 (54.0%)                      | 0.69     |
| <b>Prolonged rupture of membranes &gt;24 hr<sup>∞</sup></b>                              | 82 (10.0%)               | 92 (9.1%)                 | 68(4.9%)                         | p<0.001  |
| <b>Surfactant therapy in labour ward or neonatal unit</b>                                | 532 (64.9%)              | 613 (60.4%)               | 713(50.9%)                       | p<0.001  |
| <b>Initiation of iNO therapy (days)</b>                                                  | 2 (1,2)                  | 2 (1,2)                   | 2 (1,2)                          | 0.02     |
| <b>Duration of iNO therapy (days)</b>                                                    | 3 (2,5)                  | 3 (2,5)                   | 2 (1,5)                          | p<0.001  |
| <b>Diagnosis (not mutually exclusive)<sup>^</sup></b>                                    |                          |                           |                                  |          |
| <i>Respiratory distress syndrome*</i>                                                    | 259 (31.6%)              | 378 (37.2%)               | 778 (55.6%)                      | p<0.001  |
| <i>Pulmonary hypoplasia</i>                                                              | 61 (7.4%)                | 67 (6.6%)                 | 101 (7.2%)                       | 0.84     |
| <i>Meconium aspiration syndrome</i>                                                      | 314 (38.3%)              | 378 (37.2%)               | 440 (31.4%)                      | p<0.01   |
| <i>Pulmonary hypertension</i>                                                            | 598 (72.9%)              | 703 (69.3%)               | 885 (63.2%)                      | p<0.001  |

|                                             |             |             |             |        |
|---------------------------------------------|-------------|-------------|-------------|--------|
| <i>Congenital pneumonia</i>                 | 42 (5.1%)   | 52 (5.1%)   | 74 (5.3%)   | 0.87   |
| <i>Congenital diaphragmatic hernia</i>      | 55(6.7%)    | 57(5.6%)    | 83 (5.9%)   | 0.46   |
| <b>Death among infants who received iNO</b> | 165 (20.1%) | 160 (15.8%) | 212 (15.1%) | p<0.01 |

The denominator for all proportions is the number of babies treated with iNO unless indicated otherwise

† Denominator is all admissions to neonatal unit admissions requiring  $\geq 1$  day of intensive care

All values given as n, % or median (25<sup>th</sup>,75<sup>th</sup> centiles) as appropriate.

\*This includes the diagnosis *Respiratory distress syndrome* and *signs of respiratory distress of newborn* (see supplementary file 1)

^Extracted codes available in supplementary file

∞ Prolonged rupture of membranes >24 hrs uses a combination of discharge diagnoses and recorded duration of rupture of membranes

† 1 baby with a birthweight less than 300 grams was removed from this calculation (n=1399)

## Discussion

In this large population-level study we found that almost 1 in 20 infants that received any period of intensive care at an English neonatal unit were treated with iNO, that this rate almost doubled between 2010-2011 and 2014-2015 and that the temporal increase in iNO use was seen across all gestational ages. The temporal increase was most evident among more preterm infants < 34 weeks, in whom the use of iNO increased three-fold from 2.4% to 8.2% and where evidence for iNO is most lacking. There was a similar 3-4 fold increase in rates of iNO use for infants born <29 weeks and 29-33 weeks, from 4.9 to 15.9% and 1.1 to 4.8% for infants, respectively. In the most preterm group an additional 690 infants born <29 gestational weeks were treated with iNO in 2014-15 compared with 2010-11.

It is difficult to compare these data with internationally reported iNO usage rates because other studies commonly report rates as a proportion of all neonatal admissions, whereas we report rates as a proportion of infants receiving neonatal intensive care. We used this denominator because of differences in the organisation of neonatal care, specifically the use of a networked model of care in the United Kingdom which results in numerous transfers between neonatal units as part of routine care, and to minimise the impact of variations in practice around admissions of term infants for short periods. Rates of iNO usage in US studies are reported between 0.9% and 1.3% (2, 3) of all neonatal admissions. To our knowledge, this is one of the largest studies of iNO use in neonatal practice and the only to report data at national level; other studies have reported iNO use in a various US healthcare organisations (including children's hospitals) and in all admissions including infants receiving lower acuity categories of neonatal care (1, 4, 9, 10).

The Canadian Neonatal network (CNN) found similar rates (1 in 25; 4.2%) of iNO use among infants born <34 weeks between 2010 and 2013. As different gestational age categories were used, direct comparisons cannot be made, but the use of iNO was broadly similar to the recent UK figures. However, in contrast to the increasing use in the UK, iNO use was stable across the 4 years in the CNN (11).



1  
2  
3 Approximately half of all infants that received iNO in this study were born at < 34 weeks  
4 gestation. This is relevant because the licensed indication for iNO limits treatment to  
5 newborn infants  $\geq$  34 weeks gestation with hypoxic respiratory failure associated with  
6 clinical or echocardiographic evidence of pulmonary hypertension (12). This finding is,  
7 however, broadly consistent with other studies from the US and Europe which showed  
8 that 40-46% of all treated infants were <34 weeks gestation (3, 13). Treatment rates for  
9 preterm infants in this study (5.1% of preterm infants < 34 weeks gestation) were  
10 comparable to other studies from the US reporting rates of 2.6% to 7.2% in the same  
11 gestation groups (1, 4, 9, 10), and in this comparison the different denominator in US  
12 studies is less likely to influence results as the majority of more preterm infants will  
13 receive intensive care.  
14  
15

16 We find that not only is off-label treatment with iNO of preterm infants < 34 weeks  
17 gestation widespread, it is increasing – particularly in the most preterm infants. The  
18 evidence base supporting routine use in these most preterm infants, both in respect of  
19 safety and efficacy, is weakest (2-4). Post-hoc analyses from a study which randomised  
20 420 neonates born <34 weeks gestation to placebo or iNO found an apparent increase  
21 in mortality and higher rate of intraventricular haemorrhage in infants with a birth weight  
22  $\leq$ 1000g (14).  
23  
24

25 The reason for increasing use of iNO off-label in particularly in the most preterm infants  
26 is not known but is likely to be multifaceted and reflect the absence of other proven  
27 ‘rescue’ cardiorespiratory interventions for these smaller infants with severe hypoxaemic  
28 respiratory failure (such as extracorporeal membrane oxygenation) and full  
29 reimbursement of off-label iNO use in England. Furthermore there is some limited  
30 evidence for the use of iNO in specific groups of preterm infants including those born  
31 following preterm prolonged rupture of membranes and those with echocardiographic  
32 criteria of PPHN physiology, supported by expert opinion and consensus statements  
33 (15-18). There is growing experience in the use of iNO and the immediate short-term  
34 oxygenation response can be gratifying for clinicians, and may encourage further use.  
35 However, whether the short-term benefit in oxygenation is translated into longer-term  
36 benefit in preterm infants is unknown and needs further investigation. Moreover, the  
37  
38  
39  
40  
41  
42  
43  
44  
45  
46  
47  
48  
49  
50  
51  
52  
53  
54  
55  
56  
57  
58  
59  
60

1  
2  
3 perception of absence of harm should not be extrapolated from term infants simply  
4 because there is a lack of convincing evidence of harm in preterm infants.  
5

6  
7 Treatment with iNO was started later and duration of treatment was shorter in later  
8 epochs, suggesting that preterm infants were more commonly treated outside the acute  
9 respiratory phase. Although there is little evidence of efficacy of iNO as rescue therapy  
10 in acute respiratory failure or later ventilator-dependent chronic lung disease (19, 20),  
11 we speculate that clinicians might be increasingly willing to use off-label iNO in such  
12 circumstances.  
13  
14

15  
16 This study also demonstrates large variation between English neonatal units in rates of  
17 iNO use, in keeping with that reported in recent US studies (1, 10) where a similar  
18 degree of variation from 0.4% to 21.9% was seen in iNO use in preterm infants between  
19 13 NICHD neonatal research network centres. The variation between neonatal units in  
20 the US decreased following publication of national guidance (21). Such national  
21 guidance is not available for the UK but might help to standardise practice in this area if  
22 it were to be developed.  
23  
24

25  
26 Overall mortality decreased in iNO-treated infants during the study period. This trend  
27 mirrors national data reporting improved survival in extremely preterm infants in  
28 England (22) over a similar timeframe. The lower mortality seen in later epochs may  
29 also reflect a change in case-mix as iNO therapy is offered more readily to infants with  
30 less severe cardiorespiratory failure. This type of 'therapeutic creep' has been described  
31 with other neonatal interventions (23). This study was not designed to analyse changes  
32 in outcomes beyond simple descriptive data.  
33  
34

35  
36 The strengths of this study include the use of a large national dataset derived from  
37 electronic patient data routinely entered by health professionals at the point of care,  
38 which has been shown to be accurate and complete. This contrasts with previous  
39 similar reports such as those from the National Institute of Child Health and  
40 Development Neonatal Research Network and the Pediatrix Medical Group that have  
41 focused on admissions to tertiary neonatal units or to a large network of neonatal care  
42 providers respectively (3, 9). Limitations of this study include that data held in the  
43 NNRD are recorded as part of routine clinical care and we cannot exclude the possibility  
44  
45  
46  
47  
48  
49  
50  
51  
52  
53  
54  
55  
56  
57  
58  
59  
60

1  
2  
3 of incomplete or inaccurate data. Also, we did not set out to capture information about  
4 neonatal iNO use in other critical care settings, such as paediatric or cardiac intensive  
5 care units and these data would have been excluded from this study. Our study was  
6 also not designed to describe specific aspects of iNO therapy such as indication for use  
7 and dosage regimens.  
8  
9  
10  
11  
12  
13

14 Our study describes the increasing use of iNO, especially in more preterm infants, but  
15 was not designed to address the issue of potential benefits and risks of this practice.  
16 While iNO might be effective in certain subgroups of preterm infants, such as those with  
17 pulmonary hypoplasia and/or PPHN physiology, its short- and long-term safety has not  
18 yet been established. Potential concerns include an association between neonatal iNO  
19 therapy and pulmonary toxicity, brain injury and an increased risk of childhood cancer  
20 (24, 25). Inhaled nitric oxide is also one of the most expensive treatments available in  
21 neonatal care and there are likely to be resource implications of increasing use.  
22 Although there are limited data on costs of iNO therapy in the UK (26), estimates from  
23 the USA suggest a cost of approximately \$125/hour or \$3000/day (27).  
24  
25  
26  
27  
28  
29  
30  
31  
32  
33

34 In summary, the use of iNO in English neonatal units has almost doubled between 2010  
35 and 2015, with the most notable increase seen in the most premature infants. There  
36 was substantial variation in iNO use between units. Approximately half of treated infants  
37 were preterm < 34 weeks gestation in whom iNO was used off-label and without high  
38 quality evidence of efficacy or safety. Development of consensus guidelines may help  
39 standardise practice. Given the cost of iNO therapy, limited evidence of efficacy in  
40 preterm infants, and potential for harm, we suggest that exposure to iNO should be  
41 limited, ideally to infants included in research studies (either observational or RCT) or  
42 within a protocolised pathway that permits a short trial of iNO to assess acute  
43 oxygenation response. Development of consensus guidelines might also help to  
44 standardise practice.  
45  
46  
47  
48  
49  
50  
51  
52  
53  
54  
55  
56  
57  
58  
59  
60

## What is already known on this topic

maximum of 3 brief statements (no more than 25 words per statement)

- Inhaled nitric oxide (iNO) is a well-established and licensed therapy in term and near-term infants with hypoxaemic respiratory failure and pulmonary hypertension
- Evidence for the safety and efficacy of iNO in preterm infants is lacking
- iNO use is highly variable internationally; data describing iNO use across neonatal units in the United Kingdom is lacking

## What this study adds

maximum of 3 brief statements (no more than 25 words per statement).

- Use of iNO increased significantly over time from 3.4% (1,293/37,885) in 2010-2011 to 6.4% (3,112/48,838) in 2014-2015
- The increase in use of iNO is most notable in the most preterm infants born <29 weeks for which there is a paucity of evidence of benefit
- There is wide variation in iNO usage between neonatal intensive care units in England

## Acknowledgements

We thank the families that agreed to the inclusion of their infants' data in the NNRD, the health professionals in the UK Neonatal Collaborative who recorded the data.

## Funding:

Data extraction was funded through discretionary funding from the University of Liverpool held by NS.

## Author contributions

Study concept and design: NS, CG

Development of source code: KO, SJ, CB

Analysis and interpretation of data: NS, SJ, CG, CB

Writing and revision of the manuscript: NS, SJ, KO, CG, CB

## Competing interests

CG reports grants from Medical Research Council, the National Institute for Health Research, the Mason Medical Research Foundation, Rosetrees Foundation and Canadian Institute for Health Research outside the submitted work; and grants and personal fees to attend an educational conference from Chiesi Pharmaceuticals outside the submitted work; he is a voluntary, unremunerated member of the Neonatal Data Analysis Unit Steering Board, which oversees the National Neonatal Research Database (NNRD), and is vice-chair of the NIHR Research for Patient Benefit London Regional Assessment Panel.

CB reports grants from the National Institute for Health Research outside the submitted work; and grants and personal fees to attend educational conferences from Chiesi and Abbvie Pharmaceuticals outside the submitted work; and is a member of the NIHR HTA prioritisation committee.

## Data and materials availability:

The NNRD is not immediately available to the public. However, requests can be made by researchers to acquire access through: <https://www.imperial.ac.uk/neonatal-data-analysis-unit/neonatal-data/utilising-the-nnr/>

## References

1. Stenger MR, Slaughter JL, Kelleher K, Shepherd EG, Klebanoff MA, Reagan P, et al. Hospital variation in nitric oxide use for premature infants. *Pediatrics*. 2012;129(4):e945-51.
2. Clark RH, Ursprung RL, Walker MW, Ellsbury DL, Spitzer AR. The changing pattern of inhaled nitric oxide use in the neonatal intensive care unit. *J Perinatol*. 2010;30(12):800-4.
3. Ellsworth MA, Harris MN, Carey WA, Spitzer AR, Clark RH. Off-label use of inhaled nitric oxide after release of NIH consensus statement. *Pediatrics*. 2015;135(4):643-8.
4. Handley SC, Steinhorn RH, Hopper AO, Govindaswami B, Bhatt DR, Van Meurs KP, et al. Inhaled nitric oxide use in preterm infants in California neonatal intensive care units. *Journal of perinatology : official journal of the California Perinatal Association*. 2016;36(8):635-9.
5. Gaddam Bhoomaiah S, Rasiah SV. Outcomes of inhaled nitric oxide in preterm neonates - a five-year experience in a tertiary neonatal centre. *Acta Paediatr*. 2015;104(9):880-2.
6. Neonatal Data Analysis Unit. Neonatal Data Set 2014 [Available from: [https://www1.imperial.ac.uk/resources/7567FFEA-2D3D-493C-A959-46BB76794CEE/neonataldatasetisb1595release1version22\\_circulationversion1\\_appendix\\_one.pdf](https://www1.imperial.ac.uk/resources/7567FFEA-2D3D-493C-A959-46BB76794CEE/neonataldatasetisb1595release1version22_circulationversion1_appendix_one.pdf)].
7. Battersby C, Statnikov Y, Santhakumaran S, Gray D, Modi N, Costeloe K, et al. The United Kingdom National Neonatal Research Database: A validation study. *PLoS One*. 2018;13(8):e0201815.
8. BAPM. Categories of care 2011 [Available from: <http://www.bapm.org/publications/documents/guidelines/CatsofcarereportAug11.pdf>].
9. Truog WE, Nelin LD, Das A, Kendrick DE, Bell EF, Carlo WA, et al. Inhaled nitric oxide usage in preterm infants in the NICHD Neonatal Research

1  
2  
3 Network: inter-site variation and propensity evaluation. *J Perinatol.*  
4 2014;34(11):842-6.

5  
6 10. Carey WA, Weaver AL, Mara KC, Clark RH. Inhaled Nitric Oxide in  
7 Extremely Premature Neonates With Respiratory Distress Syndrome.  
8 *Pediatrics.* 2018;141(3):e20173108.

9  
10 11. Soraisham AS, Harabor A, Shivananda S, Alvaro R, Ye XY, Lee SK, et  
11 al. Trends and Variations in the Use of Inhaled Nitric Oxide in Preterm Infants  
12 in Canadian Neonatal Intensive Care Units. *Am J Perinatol.* 2016;33(07):715-  
13 22.

14  
15 12. Agency EM. iNOmax Summary of Product Characteristics [Available  
16 from: [https://www.ema.europa.eu/en/documents/product-information/inomax-](https://www.ema.europa.eu/en/documents/product-information/inomax-epar-product-information_en.pdf)  
17 [epar-product-information\\_en.pdf](https://www.ema.europa.eu/en/documents/product-information/inomax-epar-product-information_en.pdf).

18  
19 13. Dewhurst C, Ibrahim H, Göthberg S, Jónsson B, Subhedar N, registry  
20 ObotEino. Use of inhaled nitric oxide in the new born period: results from the  
21 European inhaled nitric oxide registry. *Acta Paediatrica.* 2010;99(6):854-60.

22  
23 14. Van Meurs KP, Wright LL, Ehrenkranz RA, Lemons JA, Ball MB, Poole  
24 WK, et al. Inhaled Nitric Oxide for Premature Infants with Severe Respiratory  
25 Failure. *New England Journal of Medicine.* 2005;353(1):13-22.

26  
27 15. Chock VY, Van Meurs KP, Hintz SR, Ehrenkranz RA, Lemons JA,  
28 Kendrick DE, et al. Inhaled nitric oxide for preterm premature rupture of  
29 membranes, oligohydramnios, and pulmonary hypoplasia. *Am J Perinatol.*  
30 2009;26(4):317-22.

31  
32 16. de Waal K, Kluckow M. Prolonged rupture of membranes and pulmonary  
33 hypoplasia in very preterm infants: pathophysiology and guided treatment. *J*  
34 *Pediatr.* 2015;166(5):1113-20.

35  
36 17. Baczynski M, Ginty S, Weisz DE, McNamara PJ, Kelly E, Shah P, et al.  
37 Short-term and long-term outcomes of preterm neonates with acute severe  
38 pulmonary hypertension following rescue treatment with inhaled nitric oxide.  
39 *Arch Dis Child Fetal Neonatal Ed.* 2017;102(6):F508-f14.

40  
41 18. Kinsella JP, Steinhorn RH, Krishnan US, Feinstein JA, Adatia I, Austin  
42 ED, et al. Recommendations for the Use of Inhaled Nitric Oxide Therapy in  
43 Premature Newborns with Severe Pulmonary Hypertension. *J Pediatr.*  
44 2016;170:312-4.



19. Barrington KJ, Finer N, Pennaforte T. Inhaled nitric oxide for respiratory failure in preterm infants. *Cochrane Database Syst Rev.* 2017;1:Cd000509.
20. Hasan SU, Potenziano J, Konduri GG, Perez JA, Van Meurs KP, Walker MW, et al. Effect of Inhaled Nitric Oxide on Survival Without Bronchopulmonary Dysplasia in Preterm Infants: A Randomized Clinical Trial. *JAMA Pediatr.* 2017;171(11):1081-9.
21. Cole FS, Alleyne C, Barks JD, Boyle RJ, Carroll JL, Dokken D, et al. NIH Consensus Development Conference statement: inhaled nitric-oxide therapy for premature infants. *Pediatrics.* 2011;127(2):363-9.
22. Santhakumaran S, Statnikov Y, Gray D, Battersby C, Ashby D, Modi N. Survival of very preterm infants admitted to neonatal care in England 2008–2014: time trends and regional variation. *Archives of Disease in Childhood - Fetal and Neonatal Edition.* 2017.
23. Kariholu U, Montaldo P, Markati T, Lally PJ, Pryce R, Teiserskas J, et al. Therapeutic hypothermia for mild neonatal encephalopathy: a systematic review and meta-analysis. *Arch Dis Child Fetal Neonatal Ed.* 2020;105(2):225-8.
24. Van Meurs KP, Cohen TL, Yang G, Somaschini M, Kuruma P, Dennery PA. Inhaled NO and markers of oxidant injury in infants with respiratory failure. *J Perinatol.* 2005;25(7):463-9.
25. Van Meurs K, Hintz S, Rhine W, Benitz W. The use of inhaled nitric oxide in the premature infant with respiratory distress syndrome. *Minerva Pediatr.* 2006;58(5):403-22.
26. Subhedar NV, Jauhari P, Natarajan R. Cost of inhaled nitric oxide therapy in neonates. *Lancet.* 2002;359(9319):1781-2.
27. Watson RS, Clermont G, Kinsella JP, Kong L, Arendt RE, Cutter G, et al. Clinical and economic effects of iNO in premature newborns with respiratory failure at 1 year. *Pediatrics.* 2009;124(5):1333-43.



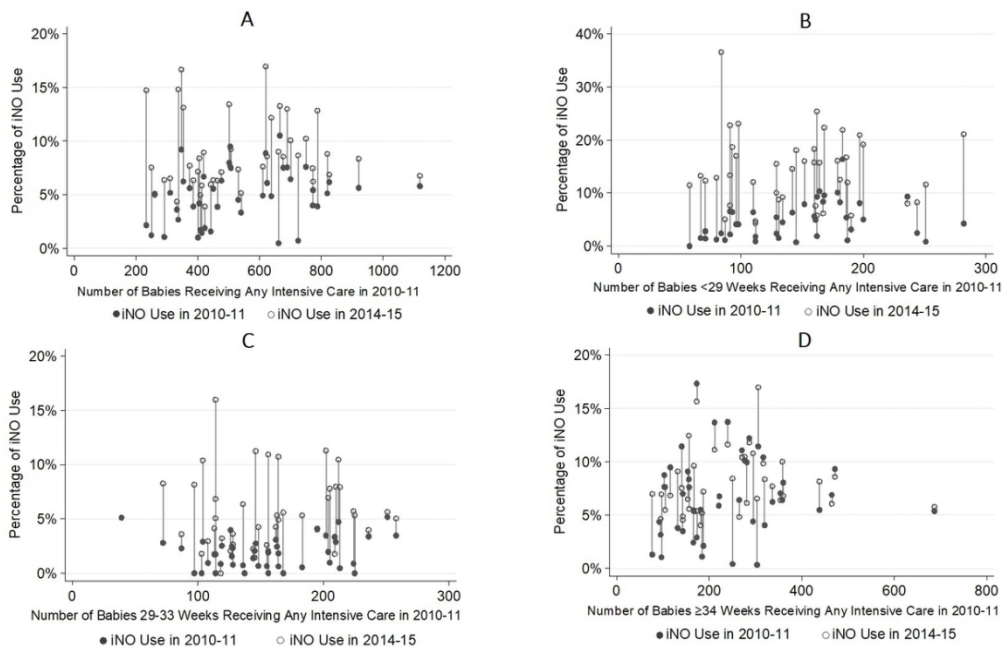

103x70mm (300 x 300 DPI)

## **Supplementary file 1**

### **Diagnostic codes<sup>†</sup> extracted from the National Neonatal Research Database (NNRD):**

Respiratory distress syndrome if any of the following:

- '15574'- signs of respiratory distress of newborn
- '15572'- Respiratory distress syndrome
- '11010179'- respiratory distress-signs of
- '15571' Respiratory Distress (ARDS)

Pulmonary hypoplasia if any of the following:

- '16143'- Hypoplastic lungs
- '16154'- Hypoplasia and dysplasia of lung
- '10892'- Pulmonary hypoplasia
- '16151'- Agenesis of lung

Persistent pulmonary hypertension of the newborn if any of the following:

- '15241'- Primary pulmonary hypertension (not PPHN)
- '15242'- Secondary pulmonary hypertension (not PPHN)
- '10010891'- Pulmonary hypertension (secondary)
- '10891'-Pulmonary hypertension (secondary)
- '10890'- Pulmonary hypertension (primary)
- '10010890'- Pulmonary hypertension (primary)
- '15621'- Pulmonary hypertension (PPHN)
- '10829'- Persistent Pulmonary Hypertension of the Newborn (PPHN)
- '15630'- Persistent Pulmonary Hypertension (PPHN secondary to other condition)
- '15629'- Persistent Pulmonary Hypertension (PPHN: idiopathic)

Meconium Aspiration Syndrome:

- '15588'- Meconium aspiration syndrome

Congenital pneumonia if any of the following:

- '15577'- Congenital pneumonia due to viral agent
- '15581'- Congenital pneumonia due to Streptococcus, group B
- '15580'- Congenital pneumonia due to Staphylococcus
- '15583'- Congenital pneumonia due to Pseudomonas
- '15585'- Congenital pneumonia due to other organisms
- '15584'- Congenital pneumonia due to other bacterial agents
- '15582'- Congenital pneumonia due to Escherichia coli
- '15578'- Congenital pneumonia due to Chlamydia
- '15586'- Congenital pneumonia (unknown or unspecified cause)
- '15587'- Congenital pneumonia

1  
2  
3  
4  
5  
6  
7  
8  
9  
10  
11  
12  
13  
14  
15  
16  
17  
18  
19  
20  
21  
22  
23  
24  
25  
26  
27  
28  
29  
30  
31  
32  
33  
34  
35  
36  
37  
38  
39  
40  
41  
42  
43  
44  
45  
46  
47  
48  
49  
50  
51  
52  
53  
54  
55  
56  
57  
58  
59  
60

Congenital diaphragmatic hernia if any of the following:

- '16495'- Congenital diaphragic hernia
- '16497'- Eventration of diaphragic hernia
- '1001925'- Unspecified repair of diaphragmatic hernia
- '1006671'- Repair of congenital diaphragmatic hernia
- '10905'- Recurrent congenital diaphragmatic hernia
- '11660'- Prosthetic repair of congenital diaphragmatic hernia (specify)
- '11657'- Primary repair of congenital diaphragmatic hernia
- '1001924'- Other specified repair of diaphragmatic hernia
- '11597'- Other repair of diaphragmatic hernia (specify)
- '10694'- Morgagni diaphragmatic hernia
- '1015977'- Diaphragmatic hernia - right
- '1015978'- Diaphragmatic hernia - left
- '1010217'- Diaphragmatic hernia - left
- '10010246'- Diaphragmatic hernia - congenital

Prolonged rupture of membranes >24 hr if any of the following:

- '15406'- Prolonged preterm rupture membranes >24hr
- '15459'- Prolonged rupture membranes (PROM: Term)
- '15407'- Prolonged rupture membranes >24hr
- '15462'- Preterm pre-labour rupture of membranes (PROM >24hrs)

† These diagnostic codes are specific to the Badger Net EPR system developed by Clevermed Ltd and from which the NNRD pulls neonatal data.

**Supplementary file 2**

Congenital heart disease diagnoses in order of frequency

| Diagnoses                                                    | Gestation (Weeks) |            |            | N (column percentage) |
|--------------------------------------------------------------|-------------------|------------|------------|-----------------------|
|                                                              | <29               | 29 to 33   | ≥34        |                       |
| Ventricular Septal Defect (VSD)                              | 79                | 85         | 160        | 324 (27.9%)           |
| Atrial Septal Defect (ASD)                                   | 111               | 52         | 96         | 259 (22.2%)           |
| Pulmonary stenosis                                           | 31                | 23         | 15         | 69 (5.9%)             |
| Transposition of the great arteries                          | 4                 | 11         | 52         | 67 (5.8%)             |
| Ventricular hypertrophy                                      | 11                | 13         | 26         | 50 (4.3%)             |
| Atrioventricular Septal Defect (AVSD)                        | 1                 | 8          | 25         | 34 (2.9%)             |
| Coarctation of aorta                                         | 4                 | 7          | 19         | 30 (2.6%)             |
| Congenital malformations of cardiac chambers and connections | 2                 | 4          | 23         | 29 (2.5%)             |
| Tetralogy of Fallot                                          | 5                 | 6          | 14         | 25 (2.2%)             |
| Other congenital heart diagnoses                             | 34                | 55         | 186        | 275 (23.7%)           |
| <b>Total</b>                                                 | <b>282</b>        | <b>264</b> | <b>616</b> | <b>1162</b>           |

# BMJ Paediatrics Open

## Increasing use of inhaled nitric oxide in neonatal intensive care units in England: a retrospective population study

|                               |                                                                                                                                                                                                                                                                                                                                                                                                |
|-------------------------------|------------------------------------------------------------------------------------------------------------------------------------------------------------------------------------------------------------------------------------------------------------------------------------------------------------------------------------------------------------------------------------------------|
| Journal:                      | <i>BMJ Paediatrics Open</i>                                                                                                                                                                                                                                                                                                                                                                    |
| Manuscript ID                 | bmjpo-2020-000897.R2                                                                                                                                                                                                                                                                                                                                                                           |
| Article Type:                 | Original research                                                                                                                                                                                                                                                                                                                                                                              |
| Date Submitted by the Author: | 21-Jan-2021                                                                                                                                                                                                                                                                                                                                                                                    |
| Complete List of Authors:     | Subhedar, Nimish; Liverpool Women's Hospital, Neonatal Intensive care Unit<br>Jawad, Sena; Imperial College London, Neonatal Data Analysis Unit<br>Oughham, Kayleigh; Imperial College London, Neonatal Data Analysis Unit<br>Gale, Chris; Imperial College London Faculty of Medicine, Neonatal Medicine<br>Battersby, Cheryl; Imperial College London Faculty of Medicine, Neonatal Medicine |
| Keywords:                     | Neonatology, Epidemiology                                                                                                                                                                                                                                                                                                                                                                      |
|                               |                                                                                                                                                                                                                                                                                                                                                                                                |

SCHOLARONE™  
Manuscripts



I, the Submitting Author has the right to grant and does grant on behalf of all authors of the Work (as defined in the below author licence), an exclusive licence and/or a non-exclusive licence for contributions from authors who are: i) UK Crown employees; ii) where BMJ has agreed a CC-BY licence shall apply, and/or iii) in accordance with the terms applicable for US Federal Government officers or employees acting as part of their official duties; on a worldwide, perpetual, irrevocable, royalty-free basis to BMJ Publishing Group Ltd ("BMJ") its licensees and where the relevant Journal is co-owned by BMJ to the co-owners of the Journal, to publish the Work in this journal and any other BMJ products and to exploit all rights, as set out in our [licence](#).

The Submitting Author accepts and understands that any supply made under these terms is made by BMJ to the Submitting Author unless you are acting as an employee on behalf of your employer or a postgraduate student of an affiliated institution which is paying any applicable article publishing charge ("APC") for Open Access articles. Where the Submitting Author wishes to make the Work available on an Open Access basis (and intends to pay the relevant APC), the terms of reuse of such Open Access shall be governed by a Creative Commons licence – details of these licences and which [Creative Commons](#) licence will apply to this Work are set out in our licence referred to above.

Other than as permitted in any relevant BMJ Author's Self Archiving Policies, I confirm this Work has not been accepted for publication elsewhere, is not being considered for publication elsewhere and does not duplicate material already published. I confirm all authors consent to publication of this Work and authorise the granting of this licence.

**Title:**

**Increasing use of inhaled nitric oxide in neonatal intensive care units in England:  
a retrospective population study**

**Authors**

Dr. Nimish Subhedar, Neonatologist <sup>1</sup>

Ms. Sena Jawad, Neonatal Clinical Trials Statistician <sup>2</sup>

Miss. Kayleigh Ougham, Senior Data Analyst <sup>2</sup>

Dr. Chris Gale, Reader in Neonatal Medicine and Neonatologist <sup>3</sup>

Dr. Cheryl Battersby, Clinical Senior Lecturer, Neonatologist <sup>3</sup>

**Corresponding author**

Dr Cheryl Battersby, Neonatal Medicine, School of Public Health, Faculty of Medicine,  
Imperial College London, Chelsea and Westminster Hospital campus, London, SW10  
9NH. [c.battersby@imperial.ac.uk](mailto:c.battersby@imperial.ac.uk)

+44 (0) 203 3153047

1  
2  
3 **Affiliations:**  
4  
5  
6

7  
8 <sup>1</sup> Neonatal Intensive Care Unit, Liverpool Women’s Hospital, Liverpool L8 7SS.  
9

10  
11  
12 <sup>2</sup> Neonatal Data Analysis Unit, Imperial College London, Chelsea and Westminster  
13 Hospital campus, London, SW10 9NH.  
14  
15

16  
17  
18 <sup>3</sup> Neonatal Medicine, School of Public Health, Faculty of Medicine, Imperial College  
19 London, Chelsea and Westminster Hospital campus, London, SW10 9NH.  
20  
21  
22  
23  
24  
25  
26  
27  
28  
29  
30  
31  
32  
33  
34  
35  
36  
37  
38  
39  
40  
41  
42  
43  
44  
45  
46  
47  
48  
49  
50  
51  
52  
53  
54  
55  
56  
57  
58  
59  
60



## Abstract

### Objective

To describe temporal changes in inhaled Nitric Oxide (iNO) use in English neonatal units between 2010 to 2015

### Design

Retrospective analysis using data extracted from the National Neonatal Research Database (NNRD)

### Setting

All National Health Service neonatal units in England

### Patients

Infants of all gestational ages born 2010- 2015 admitted to a neonatal unit and received intensive care

### Main outcome measures

Proportion of infants who received iNO; age at initiation and duration of iNO use

### Results

4.9% (6,346/129,883) of infants received iNO; 31% (1,959/6,346) were born <29 weeks, 18% (1,152/6,346) 29-33 weeks and 51% (3,235/6,346) >34 weeks gestation. Between epoch 1 (2010-2011) and epoch 3 (2014-2015), there was i) an increase in the proportion of infants receiving iNO: < 29 weeks (4.9 vs 15.9%); 29-33 weeks (1.1 vs 4.8%); > 34 weeks (4.5 vs 5.0%) ii) increase in postnatal age at iNO initiation: <29 weeks 10 vs 18 days; 29-33 weeks 2 vs 10 days iii) reduction in iNO duration: <29 weeks (3 vs 2 days); 29-33 weeks (2 vs 1 day).

### Conclusions

1  
2  
3 Between 2010 and 2015 there was an increase in the use of iNO among infants  
4 admitted to English neonatal units. This was most notable among the most premature  
5 infants with an almost four-fold increase. Given the cost of iNO therapy, limited  
6 evidence of efficacy in preterm infants, and potential for harm, we suggest that  
7 exposure to iNO should be limited, ideally to infants included in research studies (either  
8 observational or RCT) or within a protocolised pathway. Development of consensus  
9 guidelines may also help to standardise practice.  
10  
11  
12  
13  
14  
15  
16  
17  
18  
19  
20  
21  
22  
23  
24  
25  
26  
27  
28  
29  
30  
31  
32  
33  
34  
35  
36  
37  
38  
39  
40  
41  
42  
43  
44  
45  
46  
47  
48  
49  
50  
51  
52  
53  
54  
55  
56  
57  
58  
59  
60

## Introduction

Inhaled nitric oxide (iNO) is widely used in the treatment of hypoxaemic respiratory failure and persistent pulmonary hypertension of the newborn. Although a well-established therapy in term and near-term infants with these conditions, the off-label use of iNO in preterm infants <34 weeks gestation remains controversial. Population-based data indicate that there is wide variation in administration rates amongst US hospitals, but there are no equivalent data from the UK or mainland Europe (1-4). Data from individual centres and multicentre studies suggest that the use of iNO is increasing (2-5), especially in preterm infants, despite the lack of evidence of benefit in this population.

We aimed to describe temporal changes in the use of iNO in neonates admitted to neonatal units in England using national data routinely recorded during clinical care and held in the National Neonatal Research database (NNRD). Our objectives were to i) describe the proportion and characteristics of preterm and term infants who receive iNO between 2010 and 2015; ii) determine whether there is variation in iNO use across tertiary level neonatal units, and over time between 2010 and 2015.

## Methods

### Setting, study design, data source and ethics approval

This retrospective cohort study used routinely recorded, de-identified data held in the NNRD. The NNRD has complete coverage of infants admitted for neonatal care at a National Health Service (NHS) neonatal unit in England, Scotland and Wales. The NNRD is formed from data extracted from neonatal electronic health record systems used by health professionals during routine clinical care. A defined data extract comprising approximately 450 items (6), the Neonatal Data Set, is transmitted quarterly to the Neonatal Data Analysis Unit at Imperial College London where data are cleaned and entered into the NNRD. High completeness and accuracy (>95%) of data held in the NNRD has been confirmed by a formal comparison with those recorded in Case Record Forms of a multicentre, randomised placebo-controlled trial (RCT) (7). Neonatal units in England contributing data to the NNRD consented for their unit data to be included in the study. This study using anonymised data was approved by the West of Scotland Research Ethics Committee 5; reference number 16/WS/0228.

### Study population and data extraction

We included data from infants who required any neonatal intensive care (defined using British Association of Perinatal Medicine categories of care 2011 (8), primarily as needing mechanical ventilation or non-invasive ventilation plus parenteral nutrition) over a 6-year period, 01/01/2010 to 31/12/2015 in England. Infants who did not receive intensive care on a neonatal unit or who were not cared for completely in units in Wales and Scotland, were excluded from the analysis.

We extracted daily variables (receipt of iNO, surfactant), demographic variables (birthweight, sex, gestational age), maternal factors (prolonged rupture of membranes >24 hours), diagnoses and survival to neonatal unit discharge. See supplementary file 1 for diagnostic codes.

### Outcomes

1  
2  
3 The primary outcome was rate of iNO use as a proportion of infants that received  
4 neonatal intensive care, and unit level.  
5  
6  
7

8  
9 The following secondary outcomes were analysed for infants that received iNO:

- 10  
11 - Timing of iNO initiation (postnatal age in days)  
12  
13 - Duration of iNO  
14  
15 - Diagnoses including respiratory distress syndrome (RDS), persistent pulmonary  
16 hypertension of the newborn (PPHN), pulmonary hypoplasia, congenital pneumonia,  
17 congenital diaphragmatic hernia, congenital heart disease, meconium aspiration  
18 syndrome (among infants  $\geq 34$  weeks gestation)  
19  
20 - Survival to neonatal unit discharge  
21  
22  
23  
24  
25  
26  
27

## 28 **Statistical analyses**

29  
30 We describe the cohort at two levels: 1) at the level of the population of infants that  
31 received at least 1 day of neonatal intensive care; and 2) at the level of the neonatal  
32 unit. For all outcomes separate analyses were conducted by *a-priori* defined gestational  
33 age bands: (a) extremely preterm (< 29 weeks gestation); (b) moderately preterm (29-  
34 33 weeks gestation); and (c) late preterm/term (> 34 weeks gestation).  
35  
36  
37  
38

39 Results are presented using medians (interquartile ranges) and percentages for  
40 continuous and categorical variables, respectively.  
41  
42

43 For the neonatal unit-level analysis, we limited this to the 47 tertiary neonatal units in  
44 England who have treated 5 or more infants with nitric oxide. For this analysis we  
45 attributed iNO use to the first unit providing iNO therapy regardless of whether an infant  
46 was treated with iNO in more than one neonatal unit. The total number of neonatal units  
47 in England during this period decreased from 169 (in 2010-11) to 161 (in 2014-15); this  
48 reflects the merger or closure of units. Rates of iNO use across tertiary units are  
49 presented graphically without comparative testing.  
50  
51  
52  
53  
54  
55  
56  
57  
58  
59  
60

## Patient and Public Involvement

Results will be disseminated to parents, ex-patients and members of the public through the Imperial College Neonatal Data Analysis Unit website, social media, and strong links between the authors and parent/patient groups.

## Results

During the 6-year study period 129,883 infants received at least 1 day of intensive care in England; 4.9% (6,346) of these received iNO. Use of iNO increased over time from 3.4% (1,293/37,885) in 2010-2011 to 6.4% (3,112/48,838) in 2014-2015.

When analysed by gestational age band over the entire study period, 9.9% (1,959/19,727) of infants born <29 weeks received iNO; corresponding percentages are 2.8% (1,152/41,133) for 29-33 weeks and 4.7% (3,235/69,022) for  $\geq$  34 weeks (Tables 1-3). Mortality among iNO treated infants decreased over time in all gestational age groups.

### By gestational age bands

#### <29 weeks

31% (1,959/6,346) of infants that received iNO were born < 29 weeks gestation (Table 1). Among infants born in the later epoch, a lower proportion had diagnoses of prolonged rupture of membranes or pulmonary hypoplasia recorded and a higher proportion had RDS recorded and received surfactant. (Table 1). 282 had congenital heart disease; the most common were atrial or ventricular septal defects (67%) (Supplementary Table 2).

#### 29-33 weeks

18% (1,152/6,346) of infants that received iNO were born at 29-33 weeks gestation. A lower proportion of infants born in the later epoch had PPHN recorded and a higher proportion had RDS recorded, although surfactant use was lower in the later epoch. In

the 2014-2015 epoch iNO was initiated later and administered for a shorter duration (Table 2). 264 infants had congenital heart disease; 52% were atrial or ventricular septal defects (Supplementary Table 2).

### **≥34 weeks**

51% (3,235/6,346) of infants that received iNO had a gestational age of  $\geq 34$  weeks at birth. The proportion of these infants who received iNO increased marginally between 2010-2011 and 2014-2015. A lower proportion of these infants born in the later epoch had prolonged rupture of membranes, PPHN or meconium aspiration syndrome, and a higher proportion had RDS recorded and received surfactant. iNO was initiated later and administered for a shorter duration (Table 3). 616 of these infants that received iNO had congenital heart disease and 41.6% (256/616) were atrial or ventricular septal defects (Supplementary Table 2).

### **Comparison between tertiary units**

There was wide variation in the proportion of infants receiving intensive care who also received iNO between the 47 tertiary neonatal intensive care units in England across all gestation groups (figure 1A). This was especially marked among infants  $< 29$  weeks gestation where iNO use varied between 0.7% and 36.5% (Figure 1B).

When considering unit level trends over time, iNO use in  $>29$  week gestation infants increased between 2010-2011 and 2014-2015 in almost all units (figure 1C), however a more mixed picture was seen in less preterm infants (figure 1D).

### **Table 1**

Patient demographics and outcomes for infants born less than 29 weeks gestation admitted to neonatal units in England and treated with iNO

|  | <b>2010-11</b> | <b>2012-13</b> | <b>2014-15</b> |
|--|----------------|----------------|----------------|
|--|----------------|----------------|----------------|

|                                                                                                       |                  |                  |                  |
|-------------------------------------------------------------------------------------------------------|------------------|------------------|------------------|
| <b>Neonatal admissions requiring <math>\geq</math> 1 day of intensive care (with and without iNO)</b> | 6730             | 6587             | 6410             |
| <b>Infants treated with iNO</b>                                                                       | 329<br>(4.9%†)   | 611<br>(9.3%†)   | 1019<br>(15.9%†) |
| <b>Birth weight (g)</b>                                                                               | 790<br>(650,950) | 795<br>(670,985) | 790<br>(660,985) |
| <b>Gestational age (weeks)</b>                                                                        | 26 (24,<br>27)   | 26 (24, 27)      | 26 (24, 27)      |
| <b>Male sex</b>                                                                                       | 180(55%)         | 364 (60%)        | 553 (54%)        |
| <b>Prolonged rupture of membranes &gt;24 hr<sup>∞</sup></b>                                           | 113<br>(34.4%)   | 190<br>(31.1%)   | 173 (17.0%)      |
| <b>Surfactant therapy in labour ward or neonatal unit</b>                                             | 324<br>(98.5%)   | 589<br>(96.4%)   | 935(91.8%)       |
| <b>Initiation of iNO therapy (day)</b>                                                                | 10 (2,33)        | 13 (2,46)        | 18 (3,48)        |
| <b>Duration of iNO therapy (days)</b>                                                                 | 3 (2,5)          | 2 (1,4)          | 2 (1,4)          |
| <b>Diagnosis (not mutually exclusive)^</b>                                                            |                  |                  |                  |
| <i>Respiratory distress* syndrome (RDS)</i>                                                           | 255<br>(77.5%)   | 505<br>(82.7%)   | 920 (90.3%)      |
| <i>Pulmonary hypoplasia</i>                                                                           | 30 (9.1%)        | 40 (6.6%)        | 49 (4.8%)        |
| <i>Pulmonary hypertension</i>                                                                         | 100<br>(30.4%)   | 164<br>(26.8%)   | 260 (25.5%)      |
| <i>Congenital pneumonia</i>                                                                           | 2 (0.6%)         | 2 (0.3%)         | 10 (1.0%)        |



|                                             |                |                |             |
|---------------------------------------------|----------------|----------------|-------------|
| <i>Congenital diaphragmatic hernia</i>      | 0              | 0              | 1 (0.1%)    |
| <b>Death among infants who received iNO</b> | 143<br>(43.5%) | 224<br>(36.7%) | 242 (23.8%) |

The denominator for all proportions is the number of babies treated with iNO unless indicated otherwise

† Denominator is all admissions to neonatal unit admissions requiring  $\geq 1$  day of intensive care

All values given as n, % or median (25<sup>th</sup>,75<sup>th</sup> centiles), as appropriate.

\*This includes the diagnosis *Respiratory distress syndrome* and *signs of respiratory distress of newborn* (see supplementary file 1)

^Extracted codes available in supplementary file

∞ Prolonged rupture of membranes >24 hrs uses a combination of discharge diagnoses and recorded duration of rupture of membranes

**Table 2**

Patient demographics and outcomes for infants born 29-33 weeks' admitted to neonatal units in England and treated with iNO

|                                                                                                       | <b>2010-11</b>           | <b>2012-13</b>           | <b>2014-15</b>                   |
|-------------------------------------------------------------------------------------------------------|--------------------------|--------------------------|----------------------------------|
| <b>Neonatal admissions requiring <math>\geq 1</math> day of intensive care (with and without iNO)</b> | 12781                    | 13796                    | 14556                            |
| <b>Infants treated with iNO</b>                                                                       | 144 (1.1% <sup>†</sup> ) | 315 (2.3% <sup>†</sup> ) | 693 (4.8% <sup>†</sup> )         |
| <b>Birth weight (g)</b>                                                                               | 1603<br>(1311,1972)      | 1500<br>(1290,1800)      | 1500 <sup>†</sup><br>(1256,1800) |
| <b>Gestational age (weeks)</b>                                                                        | 30 (29,32)               | 31 (29,32)               | 31 (30,32)                       |
| <b>Male sex</b>                                                                                       | 91 (63.2%)               | 187 (59.4%)              | 406 (58.6%)                      |
| <b>Prolonged rupture of membranes &gt;24 hr<sup>∞</sup></b>                                           | 34 (23.6%)               | 86 (27.3%)               | 124 (17.9%)                      |
| <b>Surfactant therapy in labour ward or neonatal unit</b>                                             | 131 (91.0%)              | 229 (72.7%)              | 418 (60.3%)                      |
| <b>Initiation of iNO therapy (days)</b>                                                               | 2 (1,3)                  | 3 (1,20)                 | 10 (2,24)                        |
| <b>Duration of iNO therapy (days)</b>                                                                 | 2 (2,4)                  | 1 (1,3)                  | 1 (1,2)                          |
| <b>Diagnosis (not mutually exclusive)<sup>^</sup></b>                                                 |                          |                          |                                  |

|                                             |            |             |             |
|---------------------------------------------|------------|-------------|-------------|
| <i>Respiratory distress* syndrome</i>       | 92 (63.9%) | 240 (76.2%) | 604(87.2%)  |
| <i>Pulmonary hypoplasia</i>                 | 23 (16.0%) | 46 (14.6%)  | 72 (10.4%)  |
| <i>Pulmonary hypertension</i>               | 76 (52.8%) | 108 (34.3%) | 163 (23.5%) |
| <i>Congenital pneumonia</i>                 | 1 (0.7%)   | 3 (1.0%)    | 2 (0.3%)    |
| <i>Congenital diaphragmatic hernia</i>      | 7 (4.9%)   | 11 (3.5%)   | 15 (2.2%)   |
| <b>Death among infants who received iNO</b> | 59 (41.0%) | 68 (21.6%)  | 76 (11.0%)  |

The denominator for all proportions is the number of babies treated with iNO unless indicated otherwise

† Denominator is all admissions to neonatal unit admissions requiring  $\geq 1$  day of intensive care

All values given as n, % or median (25<sup>th</sup>,75<sup>th</sup> centiles) as appropriate.

\*This includes the diagnosis *Respiratory distress syndrome* and *signs of respiratory distress of newborn* (see supplementary file 1)

^Extracted codes available in supplementary file

∞ Prolonged rupture of membranes >24 hrs uses a combination of discharge diagnoses and recorded duration of rupture of membranes

† 1 baby with a birthweight less than 300 grams was removed from this calculation (n=692)

**Table 3**

Patient demographics and outcomes for infants born >34 weeks' gestation admitted to neonatal units in England and treated with iNO

|                                                                                          | <b>2010-11</b>           | <b>2012-13</b>            | <b>2014-15</b>                   |
|------------------------------------------------------------------------------------------|--------------------------|---------------------------|----------------------------------|
| <b>Neonatal admissions requiring <math>\geq</math> 1 day of intensive care (with and</b> |                          |                           |                                  |
| <b>Infants treated with iNO</b>                                                          | 820 (4.5% <sup>†</sup> ) | 1015 (4.5% <sup>†</sup> ) | 1400 (5.0% <sup>†</sup> )        |
| <b>Birth weight (g)</b>                                                                  | 3273<br>(2840,3665)      | 3240<br>(2760,3690)       | 3220 <sup>†</sup><br>(2680,3630) |
| <b>Gestational age (weeks)</b>                                                           | 40 (38,41)               | 39 (37,40)                | 39 (37,40)                       |
| <b>Male sex</b>                                                                          | 450 (54.9%)              | 577 (56.9%)               | 756 (54.0%)                      |
| <b>Prolonged rupture of membranes &gt;24 hr<sup>∞</sup></b>                              | 82 (10.0%)               | 92 (9.1%)                 | 68(4.9%)                         |
| <b>Surfactant therapy in labour ward or neonatal unit</b>                                | 532 (64.9%)              | 613 (60.4%)               | 713(50.9%)                       |
| <b>Initiation of iNO therapy (days)</b>                                                  | 2 (1,2)                  | 2 (1,2)                   | 2 (1,2)                          |
| <b>Duration of iNO therapy (days)</b>                                                    | 3 (2,5)                  | 3 (2,5)                   | 2 (1,5)                          |
| <b>Diagnosis (not mutually exclusive)<sup>^</sup></b>                                    |                          |                           |                                  |
| <i>Respiratory distress syndrome*</i>                                                    | 259 (31.6%)              | 378 (37.2%)               | 778 (55.6%)                      |
| <i>Pulmonary hypoplasia</i>                                                              | 61 (7.4%)                | 67 (6.6%)                 | 101 (7.2%)                       |
| <i>Meconium aspiration syndrome</i>                                                      | 314 (38.3%)              | 378 (37.2%)               | 440 (31.4%)                      |
| <i>Pulmonary hypertension</i>                                                            | 598 (72.9%)              | 703 (69.3%)               | 885 (63.2%)                      |

|                                             |             |             |             |
|---------------------------------------------|-------------|-------------|-------------|
| <i>Congenital pneumonia</i>                 | 42 (5.1%)   | 52 (5.1%)   | 74 (5.3%)   |
| <i>Congenital diaphragmatic hernia</i>      | 55(6.7%)    | 57(5.6%)    | 83 (5.9%)   |
| <b>Death among infants who received iNO</b> | 165 (20.1%) | 160 (15.8%) | 212 (15.1%) |

The denominator for all proportions is the number of babies treated with iNO unless indicated otherwise

† Denominator is all admissions to neonatal unit admissions requiring  $\geq 1$  day of intensive care

All values given as n, % or median (25<sup>th</sup>,75<sup>th</sup> centiles) as appropriate.

\*This includes the diagnosis *Respiratory distress syndrome* and *signs of respiratory distress of newborn* (see supplementary file 1)

^Extracted codes available in supplementary file

∞ Prolonged rupture of membranes >24 hrs uses a combination of discharge diagnoses and recorded duration of rupture of membranes

† 1 baby with a birthweight less than 300 grams was removed from this calculation (n=1399)

## Discussion

In this large population-level study we found that almost 1 in 20 infants that received any period of intensive care at an English neonatal unit were treated with iNO, that this rate almost doubled between 2010-2011 and 2014-2015 and that the temporal increase in iNO use was seen across all gestational ages. The temporal increase was most evident among more preterm infants < 34 weeks, in whom the use of iNO increased three-fold from 2.4% to 8.2% and where evidence for iNO is most lacking. There was a similar 3-4 fold increase in rates of iNO use for infants born <29 weeks and 29-33 weeks, from 4.9 to 15.9% and 1.1 to 4.8% for infants, respectively. In the most preterm group an additional 690 infants born <29 gestational weeks were treated with iNO in 2014-15 compared with 2010-11.

It is difficult to compare these data with internationally reported iNO usage rates because other studies commonly report rates as a proportion of all neonatal admissions, whereas we report rates as a proportion of infants receiving neonatal intensive care. We used this denominator because of differences in the organisation of neonatal care, specifically the use of a networked model of care in the United Kingdom which results in numerous transfers between neonatal units as part of routine care, and to minimise the impact of variations in practice around admissions of term infants for short periods. Rates of iNO usage in US studies are reported between 0.9% and 1.3% (2, 3) of all neonatal admissions. To our knowledge, this is one of the largest studies of iNO use in neonatal practice; other studies have reported iNO use in a various US healthcare organisations (including children's hospitals) and in all admissions including infants receiving lower acuity categories of neonatal care (1, 4, 9, 10).

The Canadian Neonatal network (CNN) found similar rates (1 in 25; 4.2%) of iNO use among infants born <34 weeks between 2010 and 2013. As different gestational age categories were used, direct comparisons cannot be made, but the use of iNO was broadly similar to the recent UK figures. However, in contrast to the increasing use in the UK, iNO use was stable across the 4 years in the CNN (11).

Approximately half of all infants that received iNO in this study were born at < 34 weeks gestation. This is relevant because the licensed indication for iNO limits treatment to

1  
2  
3 newborn infants  $\geq 34$  weeks gestation with hypoxic respiratory failure associated with  
4 clinical or echocardiographic evidence of pulmonary hypertension (12). This finding is,  
5 however, broadly consistent with other studies from the US and Europe which showed  
6 that 40-46% of all treated infants were  $<34$  weeks gestation (3, 13). Treatment rates for  
7 preterm infants in this study (5.1% of preterm infants  $< 34$  weeks gestation) were  
8 comparable to other studies from the US reporting rates of 2.6% to 7.2% in the same  
9 gestation groups (1, 4, 9, 10), and in this comparison the different denominator in US  
10 studies is less likely to influence results as the majority of more preterm infants will  
11 receive intensive care.  
12

13  
14 We find that not only is off-label treatment with iNO of preterm infants  $< 34$  weeks  
15 gestation widespread, it is increasing – particularly in the most preterm infants. The  
16 evidence base supporting routine use in these most preterm infants, both in respect of  
17 safety and efficacy, is weakest (2-4). Post-hoc analyses from a study which randomised  
18 420 neonates born  $<34$  weeks gestation to placebo or iNO found an apparent increase  
19 in mortality and higher rate of intraventricular haemorrhage in infants with a birth weight  
20  $\leq 1000$ g (14).  
21

22  
23 The reason for increasing use of iNO off-label in particularly in the most preterm infants  
24 is not known but is likely to be multifaceted and reflect the absence of other proven  
25 ‘rescue’ cardiorespiratory interventions for these smaller infants with severe hypoxaemic  
26 respiratory failure (such as extracorporeal membrane oxygenation) and full  
27 reimbursement of off-label iNO use in England. Furthermore there is some limited  
28 evidence for the use of iNO in specific groups of preterm infants including those born  
29 following preterm prolonged rupture of membranes and those with echocardiographic  
30 criteria of PPHN physiology, supported by expert opinion and consensus statements  
31 (15-18). There is growing experience in the use of iNO and the immediate short-term  
32 oxygenation response can be gratifying for clinicians, and may encourage further use.  
33 However, whether the short-term benefit in oxygenation is translated into longer-term  
34 benefit in preterm infants is unknown and needs further investigation. Moreover, the  
35 perception of absence of harm should not be extrapolated from term infants simply  
36 because there is a lack of convincing evidence of harm in preterm infants.  
37  
38  
39  
40  
41  
42  
43  
44  
45  
46  
47  
48  
49  
50  
51  
52  
53  
54  
55  
56  
57  
58  
59  
60

1  
2  
3 Treatment with iNO was started later and duration of treatment was shorter in later  
4 epochs, suggesting that preterm infants were more commonly treated outside the acute  
5 respiratory phase. Although there is little evidence of efficacy of iNO as rescue therapy  
6 in acute respiratory failure or later ventilator-dependent chronic lung disease (19, 20),  
7 we speculate that clinicians might be increasingly willing to use off-label iNO in such  
8 circumstances.  
9

10  
11 This study also demonstrates large variation between English neonatal units in rates of  
12 iNO use, in keeping with that reported in recent US studies (1, 10) where a similar  
13 degree of variation from 0.4% to 21.9% was seen in iNO use in preterm infants between  
14 13 NICHD neonatal research network centres. The variation between neonatal units in  
15 the US decreased following publication of national guidance (21). Such national  
16 guidance is not available for the UK but might help to standardise practice in this area if  
17 it were to be developed.  
18  
19

20  
21 Overall mortality decreased in iNO-treated infants during the study period. This trend  
22 mirrors national data reporting improved survival in extremely preterm infants in  
23 England (22) over a similar timeframe. The lower mortality seen in later epochs may  
24 also reflect a change in case-mix as iNO therapy is offered more readily to infants with  
25 less severe cardiorespiratory failure. This type of 'therapeutic creep' has been described  
26 with other neonatal interventions (23). This study was not designed to analyse changes  
27 in outcomes beyond simple descriptive data.  
28  
29

30  
31 The strengths of this study include the use of a large national dataset derived from  
32 electronic patient data routinely entered by health professionals at the point of care,  
33 which has been shown to be accurate and complete. This contrasts with previous  
34 similar reports such as those from the National Institute of Child Health and  
35 Development Neonatal Research Network and the Pediatrix Medical Group that have  
36 focused on admissions to tertiary neonatal units or to a large network of neonatal care  
37 providers respectively (3, 9). Limitations of this study include that data held in the  
38 NNRD are recorded as part of routine clinical care and we cannot exclude the possibility  
39 of incomplete or inaccurate data. Also, we did not set out to capture information about  
40 neonatal iNO use in other critical care settings, such as paediatric or cardiac intensive  
41  
42  
43  
44  
45  
46  
47  
48  
49  
50  
51  
52  
53  
54  
55  
56  
57  
58  
59  
60



1  
2  
3 care units and these data would have been excluded from this study. Our study was  
4 also not designed to describe specific aspects of iNO therapy such as indication for use  
5 and dosage regimens.  
6  
7  
8  
9

10  
11 Our study describes the increasing use of iNO, especially in more preterm infants, but  
12 was not designed to address the issue of potential benefits and risks of this practice.  
13 While iNO might be effective in certain subgroups of preterm infants, such as those with  
14 pulmonary hypoplasia and/or PPHN physiology, its short- and long-term safety has not  
15 yet been established. Potential concerns include an association between neonatal iNO  
16 therapy and pulmonary toxicity, brain injury and an increased risk of childhood cancer  
17 (24, 25). Inhaled nitric oxide is also one of the most expensive treatments available in  
18 neonatal care and there are likely to be resource implications of increasing use.  
19 Although there are limited data on costs of iNO therapy in the UK (26), estimates from  
20 the USA suggest a cost of approximately \$125/hour or \$3000/day (27).  
21  
22  
23  
24  
25  
26  
27  
28  
29

30  
31 In summary, the use of iNO in English neonatal units has almost doubled between 2010  
32 and 2015, with the most notable increase seen in the most premature infants. There  
33 was substantial variation in iNO use between units. Approximately half of treated infants  
34 were preterm < 34 weeks gestation in whom iNO was used off-label and without high  
35 quality evidence of efficacy or safety. Given the cost of iNO therapy, limited evidence of  
36 efficacy in preterm infants, and potential for harm, we suggest that exposure to iNO  
37 should be limited, ideally to infants included in research studies (either observational or  
38 RCT) or within a protocolised pathway that permits a short trial of iNO to assess acute  
39 oxygenation response. Development of consensus guidelines might also help to  
40 standardise practice.  
41  
42  
43  
44  
45  
46  
47  
48  
49  
50  
51  
52  
53  
54  
55  
56  
57  
58  
59  
60

### What is already known on this topic

maximum of 3 brief statements (no more than 25 words per statement)

- Inhaled nitric oxide (iNO) is a well-established and licensed therapy in term and near-term infants with hypoxaemic respiratory failure and pulmonary hypertension
- Evidence for the safety and efficacy of iNO in preterm infants is lacking
- iNO use is highly variable internationally; data describing iNO use across neonatal units in the United Kingdom is lacking

### What this study adds

maximum of 3 brief statements (no more than 25 words per statement).

- Use of iNO increased over time from 3.4% (1,293/37,885) in 2010-2011 to 6.4% (3,112/48,838) in 2014-2015
- The increase in use of iNO is most notable in the most preterm infants born <29 weeks for which there is a paucity of evidence of benefit
- There is wide variation in iNO usage between neonatal intensive care units in England

### Acknowledgements

We thank the families that agreed to the inclusion of their infants' data in the NNRD, the health professionals in the UK Neonatal Collaborative who recorded the data.

### Funding:

Data extraction was funded through discretionary funding from the University of Liverpool held by NS.

## Author contributions

Study concept and design: NS, CG

Development of source code: KO, SJ, CB

Analysis and interpretation of data: NS, SJ, CG, CB

Writing and revision of the manuscript: NS, SJ, KO, CG, CB

## Competing interests

CG reports grants from Medical Research Council, the National Institute for Health Research, the Mason Medical Research Foundation, Rosetrees Foundation and Canadian Institute for Health Research outside the submitted work; and grants and personal fees to attend an educational conference from Chiesi Pharmaceuticals outside the submitted work; he is a voluntary, unremunerated member of the Neonatal Data Analysis Unit Steering Board, which oversees the National Neonatal Research Database (NNRD), and is vice-chair of the NIHR Research for Patient Benefit London Regional Assessment Panel.

CB reports grants from the National Institute for Health Research outside the submitted work; and grants and personal fees to attend educational conferences from Chiesi and Abbvie Pharmaceuticals outside the submitted work; and is a member of the NIHR HTA prioritisation committee.

## Data and materials availability:

The NNRD is not immediately available to the public. However, requests can be made by researchers to acquire access through: <https://www.imperial.ac.uk/neonatal-data-analysis-unit/neonatal-data/utilising-the-nnr/>

## References

1. Stenger MR, Slaughter JL, Kelleher K, Shepherd EG, Klebanoff MA, Reagan P, et al. Hospital variation in nitric oxide use for premature infants. *Pediatrics*. 2012;129(4):e945-51.
2. Clark RH, Ursprung RL, Walker MW, Ellsbury DL, Spitzer AR. The changing pattern of inhaled nitric oxide use in the neonatal intensive care unit. *J Perinatol*. 2010;30(12):800-4.
3. Ellsworth MA, Harris MN, Carey WA, Spitzer AR, Clark RH. Off-label use of inhaled nitric oxide after release of NIH consensus statement. *Pediatrics*. 2015;135(4):643-8.
4. Handley SC, Steinhorn RH, Hopper AO, Govindaswami B, Bhatt DR, Van Meurs KP, et al. Inhaled nitric oxide use in preterm infants in California neonatal intensive care units. *Journal of perinatology : official journal of the California Perinatal Association*. 2016;36(8):635-9.
5. Gaddam Bhoomaiah S, Rasiah SV. Outcomes of inhaled nitric oxide in preterm neonates - a five-year experience in a tertiary neonatal centre. *Acta Paediatr*. 2015;104(9):880-2.
6. Neonatal Data Analysis Unit. Neonatal Data Set 2014 [Available from: [https://www1.imperial.ac.uk/resources/7567FFEA-2D3D-493C-A959-46BB76794CEE/neonataldatasetisb1595release1version22\\_circulationversion1\\_appendix\\_one.pdf](https://www1.imperial.ac.uk/resources/7567FFEA-2D3D-493C-A959-46BB76794CEE/neonataldatasetisb1595release1version22_circulationversion1_appendix_one.pdf)].
7. Battersby C, Statnikov Y, Santhakumaran S, Gray D, Modi N, Costeloe K, et al. The United Kingdom National Neonatal Research Database: A validation study. *PLoS One*. 2018;13(8):e0201815.
8. BAPM. Categories of care 2011 [Available from: <http://www.bapm.org/publications/documents/guidelines/CatsofcarereportAug11.pdf>].
9. Truog WE, Nelin LD, Das A, Kendrick DE, Bell EF, Carlo WA, et al. Inhaled nitric oxide usage in preterm infants in the NICHD Neonatal Research

1  
2  
3 Network: inter-site variation and propensity evaluation. *J Perinatol.*  
4 2014;34(11):842-6.

5  
6 10. Carey WA, Weaver AL, Mara KC, Clark RH. Inhaled Nitric Oxide in  
7 Extremely Premature Neonates With Respiratory Distress Syndrome.  
8 *Pediatrics.* 2018;141(3):e20173108.

9  
10 11. Soraisham AS, Harabor A, Shivananda S, Alvaro R, Ye XY, Lee SK, et  
11 al. Trends and Variations in the Use of Inhaled Nitric Oxide in Preterm Infants  
12 in Canadian Neonatal Intensive Care Units. *Am J Perinatol.* 2016;33(07):715-  
13 22.

14  
15 12. Agency EM. iNOmax Summary of Product Characteristics [Available  
16 from: [https://www.ema.europa.eu/en/documents/product-information/inomax-](https://www.ema.europa.eu/en/documents/product-information/inomax-epar-product-information_en.pdf)  
17 [epar-product-information\\_en.pdf](https://www.ema.europa.eu/en/documents/product-information/inomax-epar-product-information_en.pdf).

18  
19 13. Dewhurst C, Ibrahim H, Göthberg S, Jónsson B, Subhedar N, registry  
20 ObotEino. Use of inhaled nitric oxide in the new born period: results from the  
21 European inhaled nitric oxide registry. *Acta Paediatrica.* 2010;99(6):854-60.

22  
23 14. Van Meurs KP, Wright LL, Ehrenkranz RA, Lemons JA, Ball MB, Poole  
24 WK, et al. Inhaled Nitric Oxide for Premature Infants with Severe Respiratory  
25 Failure. *New England Journal of Medicine.* 2005;353(1):13-22.

26  
27 15. Chock VY, Van Meurs KP, Hintz SR, Ehrenkranz RA, Lemons JA,  
28 Kendrick DE, et al. Inhaled nitric oxide for preterm premature rupture of  
29 membranes, oligohydramnios, and pulmonary hypoplasia. *Am J Perinatol.*  
30 2009;26(4):317-22.

31  
32 16. de Waal K, Kluckow M. Prolonged rupture of membranes and pulmonary  
33 hypoplasia in very preterm infants: pathophysiology and guided treatment. *J*  
34 *Pediatr.* 2015;166(5):1113-20.

35  
36 17. Baczynski M, Ginty S, Weisz DE, McNamara PJ, Kelly E, Shah P, et al.  
37 Short-term and long-term outcomes of preterm neonates with acute severe  
38 pulmonary hypertension following rescue treatment with inhaled nitric oxide.  
39 *Arch Dis Child Fetal Neonatal Ed.* 2017;102(6):F508-f14.

40  
41 18. Kinsella JP, Steinhorn RH, Krishnan US, Feinstein JA, Adatia I, Austin  
42 ED, et al. Recommendations for the Use of Inhaled Nitric Oxide Therapy in  
43 Premature Newborns with Severe Pulmonary Hypertension. *J Pediatr.*  
44 2016;170:312-4.

19. Barrington KJ, Finer N, Pennaforte T. Inhaled nitric oxide for respiratory failure in preterm infants. *Cochrane Database Syst Rev.* 2017;1:Cd000509.
20. Hasan SU, Potenziano J, Konduri GG, Perez JA, Van Meurs KP, Walker MW, et al. Effect of Inhaled Nitric Oxide on Survival Without Bronchopulmonary Dysplasia in Preterm Infants: A Randomized Clinical Trial. *JAMA Pediatr.* 2017;171(11):1081-9.
21. Cole FS, Alleyne C, Barks JD, Boyle RJ, Carroll JL, Dokken D, et al. NIH Consensus Development Conference statement: inhaled nitric-oxide therapy for premature infants. *Pediatrics.* 2011;127(2):363-9.
22. Santhakumaran S, Statnikov Y, Gray D, Battersby C, Ashby D, Modi N. Survival of very preterm infants admitted to neonatal care in England 2008–2014: time trends and regional variation. *Archives of Disease in Childhood - Fetal and Neonatal Edition.* 2017.
23. Kariholu U, Montaldo P, Markati T, Lally PJ, Pryce R, Teiserskas J, et al. Therapeutic hypothermia for mild neonatal encephalopathy: a systematic review and meta-analysis. *Arch Dis Child Fetal Neonatal Ed.* 2020;105(2):225-8.
24. Van Meurs KP, Cohen TL, Yang G, Somaschini M, Kuruma P, Dennery PA. Inhaled NO and markers of oxidant injury in infants with respiratory failure. *J Perinatol.* 2005;25(7):463-9.
25. Van Meurs K, Hintz S, Rhine W, Benitz W. The use of inhaled nitric oxide in the premature infant with respiratory distress syndrome. *Minerva Pediatr.* 2006;58(5):403-22.
26. Subhedar NV, Jauhari P, Natarajan R. Cost of inhaled nitric oxide therapy in neonates. *Lancet.* 2002;359(9319):1781-2.
27. Watson RS, Clermont G, Kinsella JP, Kong L, Arendt RE, Cutter G, et al. Clinical and economic effects of iNO in premature newborns with respiratory failure at 1 year. *Pediatrics.* 2009;124(5):1333-43.

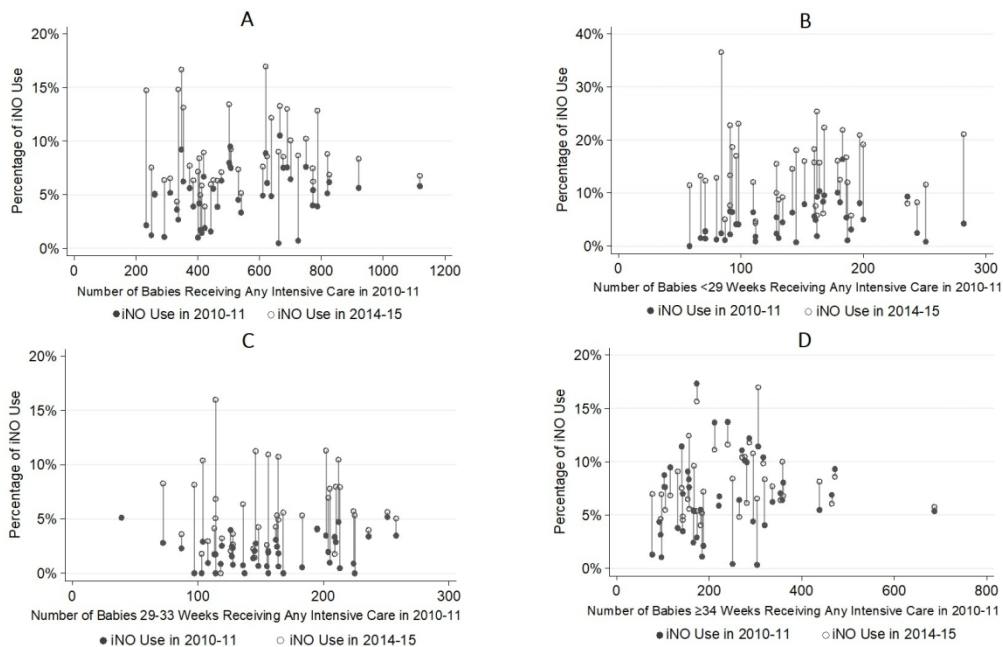

103x70mm (400 x 400 DPI)

## **Supplementary file 1**

### **Diagnostic codes<sup>†</sup> extracted from the National Neonatal Research Database (NNRD):**

Respiratory distress syndrome if any of the following:

- '15574'- signs of respiratory distress of newborn
- '15572'- Respiratory distress syndrome
- '11010179'- respiratory distress-signs of
- '15571' Respiratory Distress (ARDS)

Pulmonary hypoplasia if any of the following:

- '16143'- Hypoplastic lungs
- '16154'- Hypoplasia and dysplasia of lung
- '10892'- Pulmonary hypoplasia
- '16151'- Agenesis of lung

Persistent pulmonary hypertension of the newborn if any of the following:

- '15241'- Primary pulmonary hypertension (not PPHN)
- '15242'- Secondary pulmonary hypertension (not PPHN)
- '10010891'- Pulmonary hypertension (secondary)
- '10891'-Pulmonary hypertension (secondary)
- '10890'- Pulmonary hypertension (primary)
- '10010890'- Pulmonary hypertension (primary)
- '15621'- Pulmonary hypertension (PPHN)
- '10829'- Persistent Pulmonary Hypertension of the Newborn (PPHN)
- '15630'- Persistent Pulmonary Hypertension (PPHN secondary to other condition)
- '15629'- Persistent Pulmonary Hypertension (PPHN: idiopathic)

Meconium Aspiration Syndrome:

- '15588'- Meconium aspiration syndrome

Congenital pneumonia if any of the following:

- '15577'- Congenital pneumonia due to viral agent
- '15581'- Congenital pneumonia due to Streptococcus, group B
- '15580'- Congenital pneumonia due to Staphylococcus
- '15583'- Congenital pneumonia due to Pseudomonas
- '15585'- Congenital pneumonia due to other organisms
- '15584'- Congenital pneumonia due to other bacterial agents
- '15582'- Congenital pneumonia due to Escherichia coli
- '15578'- Congenital pneumonia due to Chlamydia
- '15586'- Congenital pneumonia (unknown or unspecified cause)
- '15587'- Congenital pneumonia



1  
2  
3  
4  
5  
6  
7  
8  
9  
10  
11  
12  
13  
14  
15  
16  
17  
18  
19  
20  
21  
22  
23  
24  
25  
26  
27  
28  
29  
30  
31  
32  
33  
34  
35  
36  
37  
38  
39  
40  
41  
42  
43  
44  
45  
46  
47  
48  
49  
50  
51  
52  
53  
54  
55  
56  
57  
58  
59  
60

Congenital diaphragmatic hernia if any of the following:

- '16495'- Congenital diaphragic hernia
- '16497'- Eventration of diaphragic hernia
- '1001925'- Unspecified repair of diaphragmatic hernia
- '1006671'- Repair of congenital diaphragmatic hernia
- '10905'- Recurrent congenital diaphragmatic hernia
- '11660'- Prosthetic repair of congenital diaphragmatic hernia (specify)
- '11657'- Primary repair of congenital diaphragmatic hernia
- '1001924'- Other specified repair of diaphragmatic hernia
- '11597'- Other repair of diaphragmatic hernia (specify)
- '10694'- Morgagni diaphragmatic hernia
- '1015977'- Diaphragmatic hernia - right
- '1015978'- Diaphragmatic hernia - left
- '1010217'- Diaphragmatic hernia - left
- '10010246'- Diaphragmatic hernia - congenital

Prolonged rupture of membranes >24 hr if any of the following:

- '15406'- Prolonged preterm rupture membranes >24hr
- '15459'- Prolonged rupture membranes (PROM: Term)
- '15407'- Prolonged rupture membranes >24hr
- '15462'- Preterm pre-labour rupture of membranes (PROM >24hrs)

† These diagnostic codes are specific to the Badger Net EPR system developed by Clevermed Ltd and from which the NNRD pulls neonatal data.

**Supplementary file 2**

Congenital heart disease diagnoses in order of frequency

| Diagnoses                                                    | Gestation (Weeks) |            |            | N (column percentage) |
|--------------------------------------------------------------|-------------------|------------|------------|-----------------------|
|                                                              | <29               | 29 to 33   | ≥34        |                       |
| Ventricular Septal Defect (VSD)                              | 79                | 85         | 160        | 324 (27.9%)           |
| Atrial Septal Defect (ASD)                                   | 111               | 52         | 96         | 259 (22.2%)           |
| Pulmonary stenosis                                           | 31                | 23         | 15         | 69 (5.9%)             |
| Transposition of the great arteries                          | 4                 | 11         | 52         | 67 (5.8%)             |
| Ventricular hypertrophy                                      | 11                | 13         | 26         | 50 (4.3%)             |
| Atrioventricular Septal Defect (AVSD)                        | 1                 | 8          | 25         | 34 (2.9%)             |
| Coarctation of aorta                                         | 4                 | 7          | 19         | 30 (2.6%)             |
| Congenital malformations of cardiac chambers and connections | 2                 | 4          | 23         | 29 (2.5%)             |
| Tetralogy of Fallot                                          | 5                 | 6          | 14         | 25 (2.2%)             |
| Other congenital heart diagnoses                             | 34                | 55         | 186        | 275 (23.7%)           |
| <b>Total</b>                                                 | <b>282</b>        | <b>264</b> | <b>616</b> | <b>1162</b>           |
