# Supplementary material for: Increase in the use of inhaled nitric oxide in neonatal intensive care units in England: a retrospective population study
Source: PubMed Central journal article supplement — BMJ Paediatr Open. 2021 Feb 22;5(1):e000897. doi: 10.1136/bmjpo-2020-000897 (PMC7903123; doi:10.1136/bmjpo-2020-000897), 2021-02-22
Supplement: bmjpo-2020-000897supp001.pdf [file bmjpo-2020-000897supp001.pdf]

### **Supplementary file 1**

#### **Diagnostic codes<sup>†</sup> extracted from the National Neonatal Research Database (NNRD):**

Respiratory distress syndrome if any of the following:

- '15574'- signs of respiratory distress of newborn
- '15572'- Respiratory distress syndrome
- '11010179'- respiratory distress-signs of
- '15571' Respiratory Distress (ARDS)

Pulmonary hypoplasia if any of the following:

- '16143'- Hypoplastic lungs
- '16154'- Hypoplasia and dysplasia of lung
- '10892'- Pulmonary hypoplasia
- '16151'- Agenesis of lung

Persistent pulmonary hypertension of the newborn if any of the following:

- '15241'- Primary pulmonary hypertension (not PPHN)
- '15242'- Secondary pulmonary hypertension (not PPHN)
- '10010891'- Pulmonary hypertension (secondary)
- '10891'-Pulmonary hypertension (secondary)
- '10890'- Pulmonary hypertension (primary)
- '10010890'- Pulmonary hypertension (primary)
- '15621'- Pulmonary hypertension (PPHN)
- '10829'- Persistent Pulmonary Hypertension of the Newborn (PPHN)
- '15630'- Persistent Pulmonary Hypertension (PPHN secondary to other condition)
- '15629'- Persistent Pulmonary Hypertension (PPHN: idiopathic)

Meconium Aspiration Syndrome:

- '15588'- Meconium aspiration syndrome

Congenital pneumonia if any of the following:

- '15577'- Congenital pneumonia due to viral agent
- '15581'- Congenital pneumonia due to Streptococcus, group B
- '15580'- Congenital pneumonia due to Staphylococcus
- '15583'- Congenital pneumonia due to Pseudomonas
- '15585'- Congenital pneumonia due to other organisms
- '15584'- Congenital pneumonia due to other bacterial agents
- '15582'- Congenital pneumonia due to Escherichia coli
- '15578'- Congenital pneumonia due to Chlamydia
- '15586'- Congenital pneumonia (unknown or unspecified cause)
- '15587'- Congenital pneumonia

Congenital diaphragmatic hernia if any of the following:

- '16495'- Congenital diaphragic hernia
- '16497'- Eventration of diaphragic hernia
- '1001925'- Unspecified repair of diaphragmatic hernia
- '1006671'- Repair of congenital diaphragmatic hernia
- '10905'- Recurrent congenital diaphragmatic hernia
- '11660'- Prosthetic repair of congenital diaphragmatic hernia (specify)
- '11657'- Primary repair of congenital diaphragmatic hernia
- '1001924'- Other specified repair of diaphragmatic hernia
- '11597'- Other repair of diaphragmatic hernia (specify)
- '10694'- Morgagni diaphragmatic hernia
- '1015977'- Diaphragmatic hernia - right
- '1015978'- Diaphragmatic hernia - left
- '1010217'- Diaphragmatic hernia - left
- '10010246'- Diaphragmatic hernia - congenital

Prolonged rupture of membranes >24 hr if any of the following:

- '15406'- Prolonged preterm rupture membranes >24hr
- '15459'- Prolonged rupture membranes (PROM: Term)
- '15407'- Prolonged rupture membranes >24hr
- '15462'- Preterm pre-labour rupture of membranes (PROM >24hrs)

† These diagnostic codes are specific to the Badger Net EPR system developed by Clevermed Ltd and from which the NNRD pulls neonatal data.

**Supplementary file 2**

Congenital heart disease diagnoses in order of frequency

| Diagnoses                                                    | Gestation (Weeks) |            |            | N (column percentage) |
|--------------------------------------------------------------|-------------------|------------|------------|-----------------------|
|                                                              | <29               | 29 to 33   | ≥34        |                       |
| Ventricular Septal Defect (VSD)                              | 79                | 85         | 160        | 324 (27.9%)           |
| Atrial Septal Defect (ASD)                                   | 111               | 52         | 96         | 259 (22.2%)           |
| Pulmonary stenosis                                           | 31                | 23         | 15         | 69 (5.9%)             |
| Transposition of the great arteries                          | 4                 | 11         | 52         | 67 (5.8%)             |
| Ventricular hypertrophy                                      | 11                | 13         | 26         | 50 (4.3%)             |
| Atrioventricular Septal Defect (AVSD)                        | 1                 | 8          | 25         | 34 (2.9%)             |
| Coarctation of aorta                                         | 4                 | 7          | 19         | 30 (2.6%)             |
| Congenital malformations of cardiac chambers and connections | 2                 | 4          | 23         | 29 (2.5%)             |
| Tetralogy of Fallot                                          | 5                 | 6          | 14         | 25 (2.2%)             |
| Other congenital heart diagnoses                             | 34                | 55         | 186        | 275 (23.7%)           |
| <b>Total</b>                                                 | <b>282</b>        | <b>264</b> | <b>616</b> | <b>1162</b>           |
